# Supplementary material for: Pediatric multicellular tumor spheroid models illustrate a therapeutic potential by combining BH3 mimetics with Natural Killer (NK) cell-based immunotherapy
Source: Springer Nature journal article supplement (doi:10.1038/s41420-021-00812-6), 2022-01-10

# Supplementary Figure 1

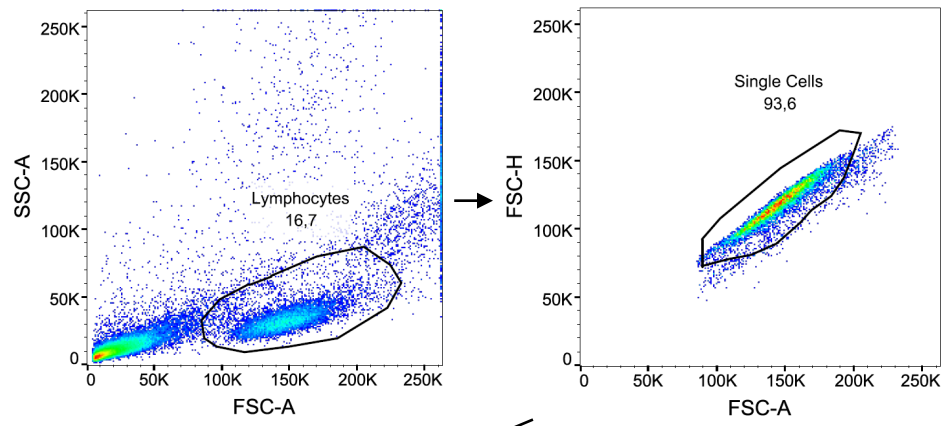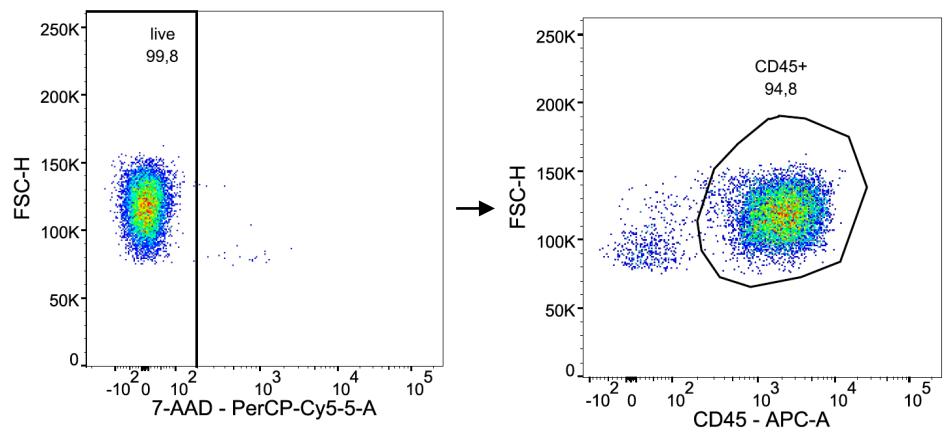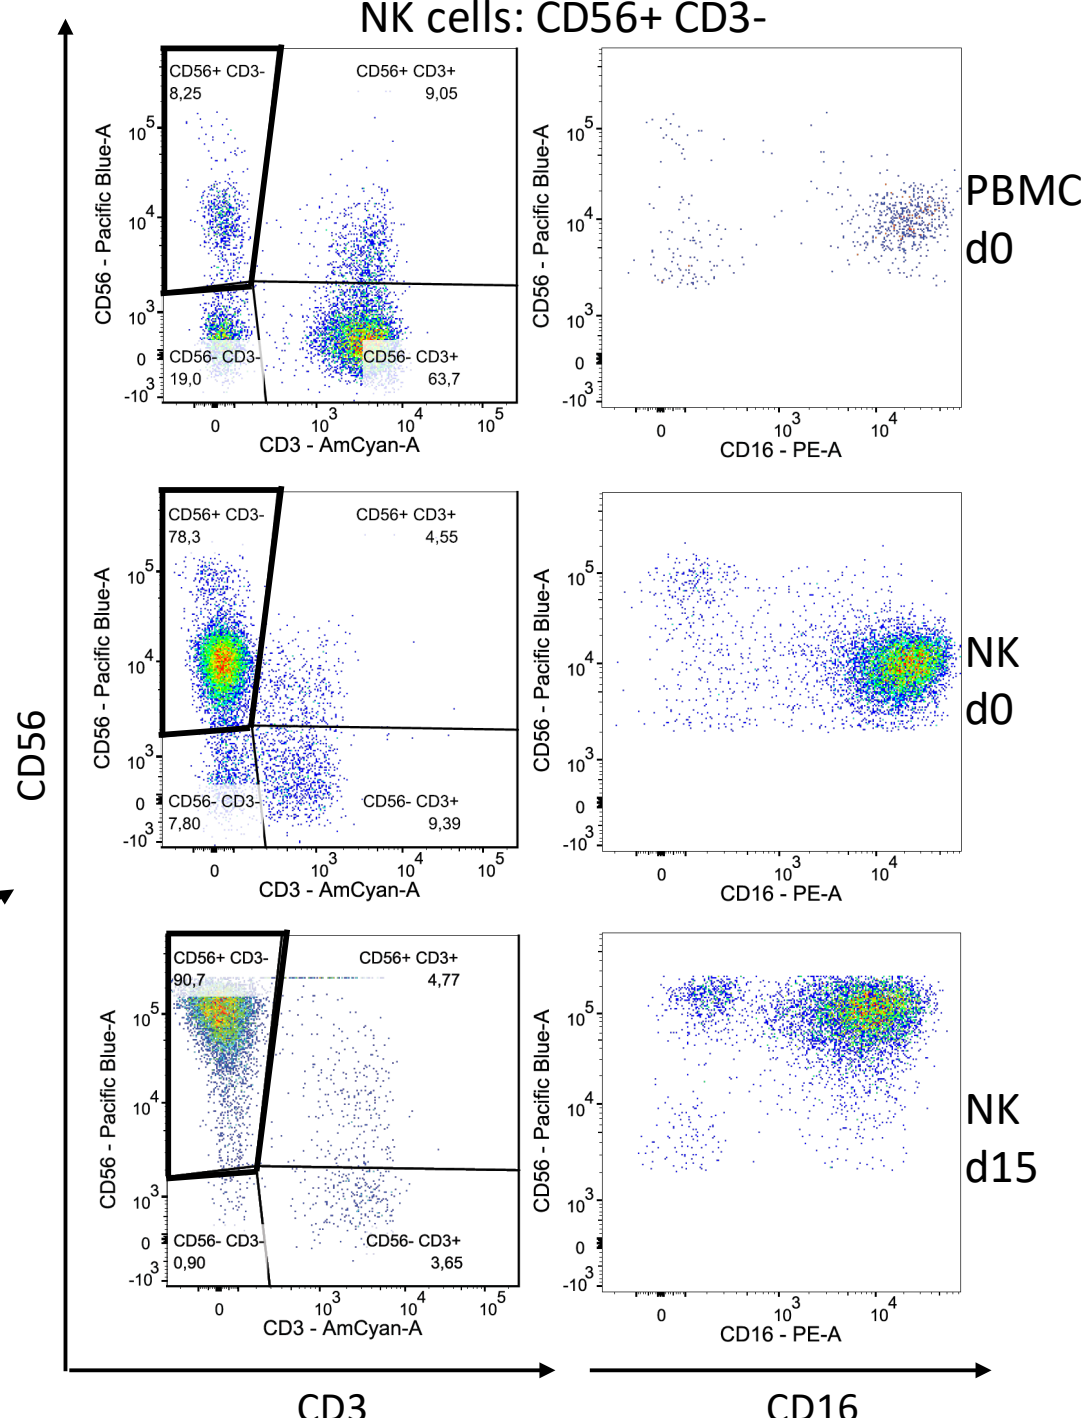

# Supplementary Figure 2

## RD-GFP

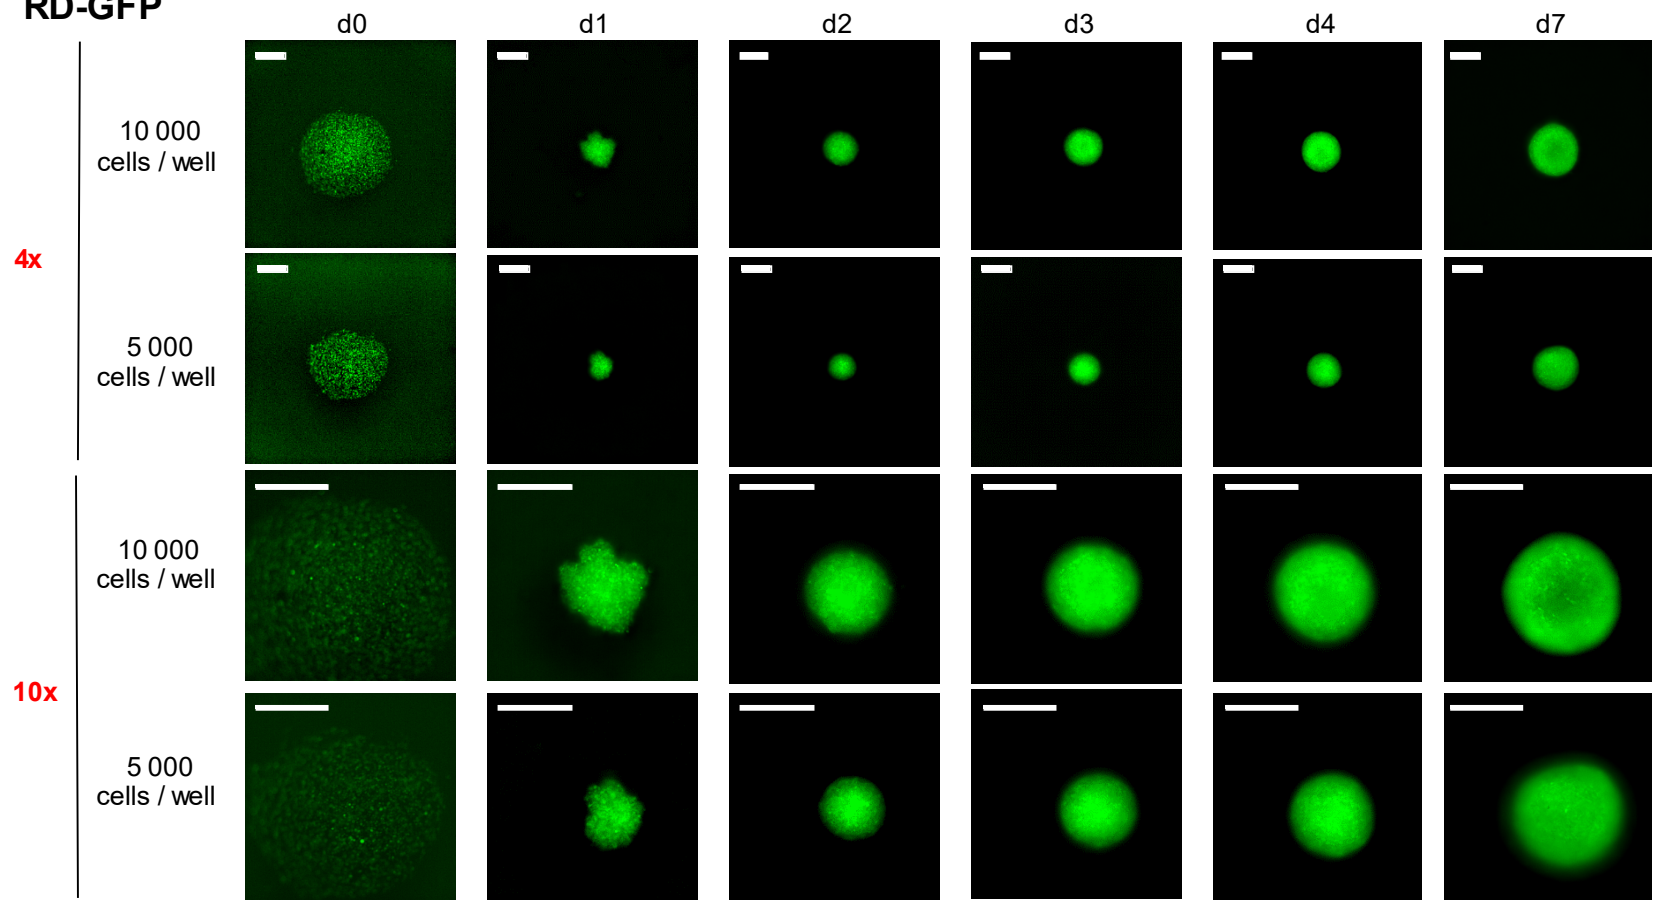

scalebar: 500  $\mu$ m

# Supplementary Figure 3

## Rhabdomyosarcoma

T174

TE381.T

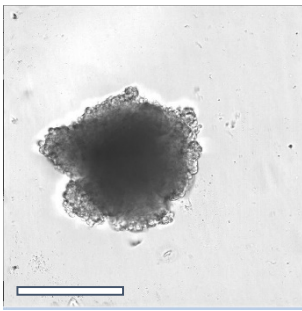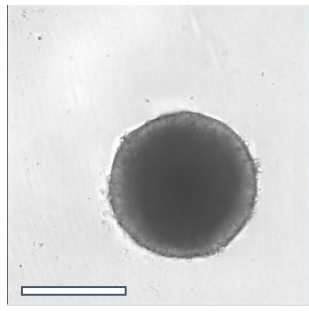

## Rhabdomyosarcoma

RD-GFP

RH30-GFP

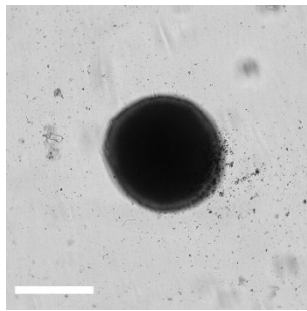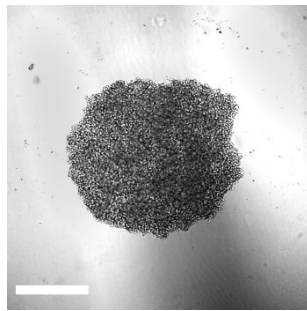

## Osteosarcoma

U2OS

MG63

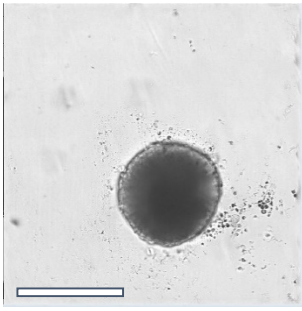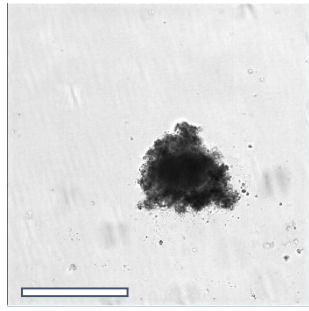

## Neuroblastoma

SK-N-AS

UKF-NB3

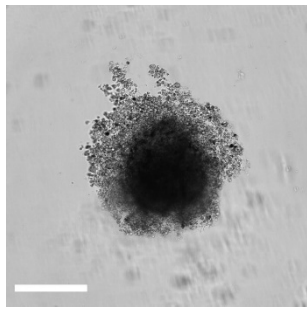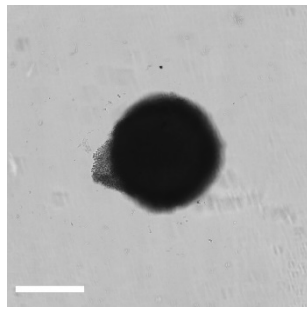

## Primary tumor tissues

Neuroblastoma-1

Neuroblastoma-2

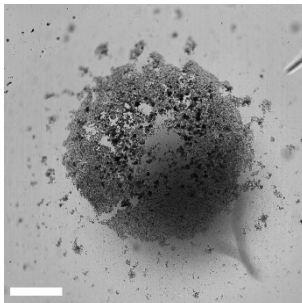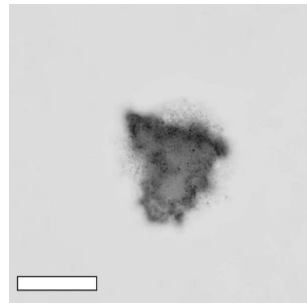

# Supplementary Figure 4

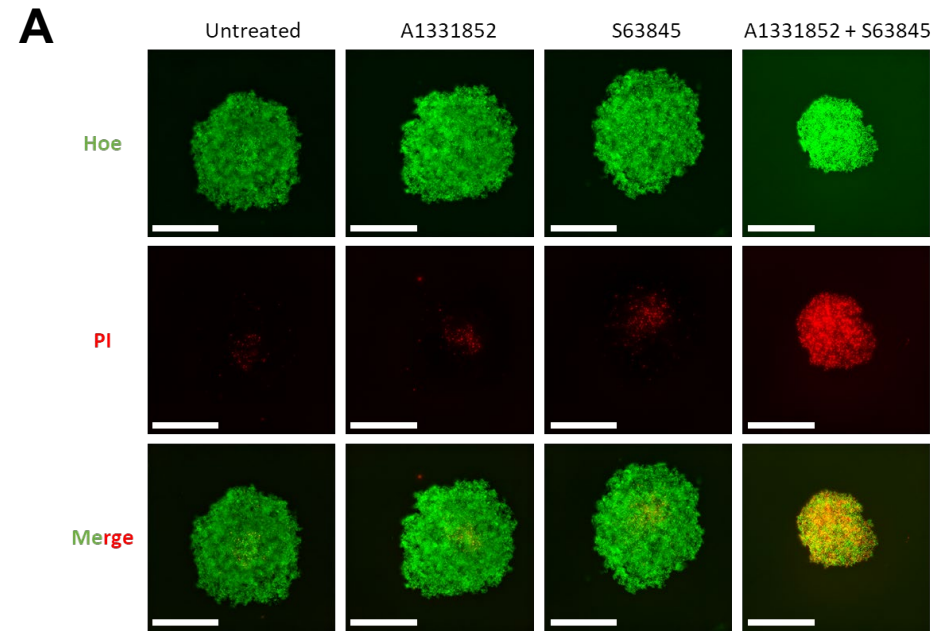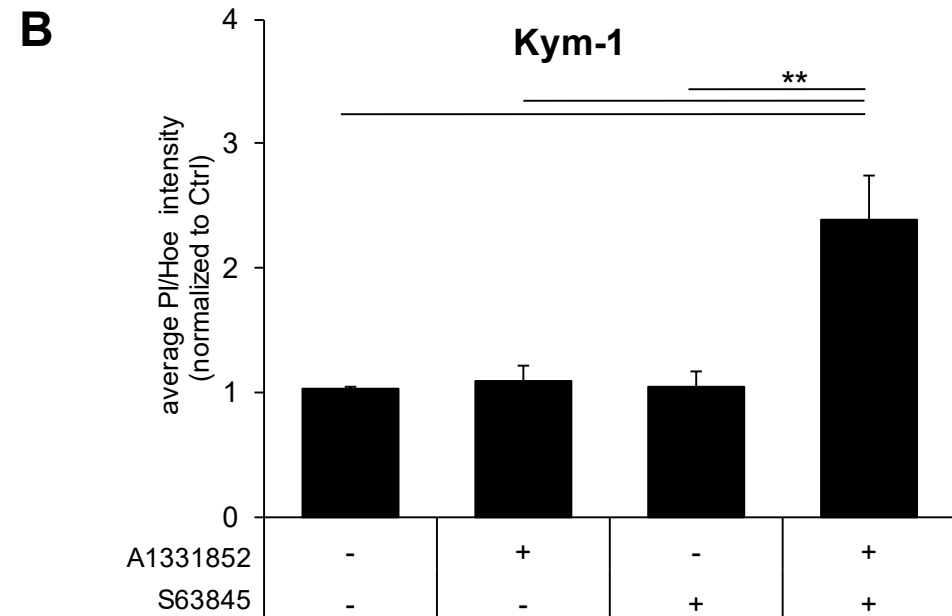

# Supplementary Figure 5

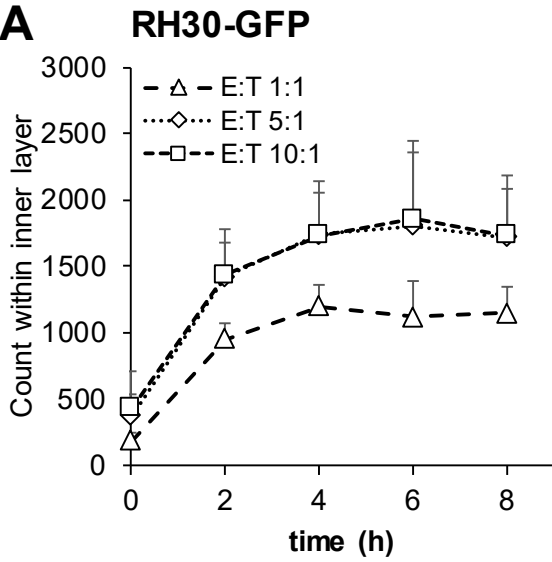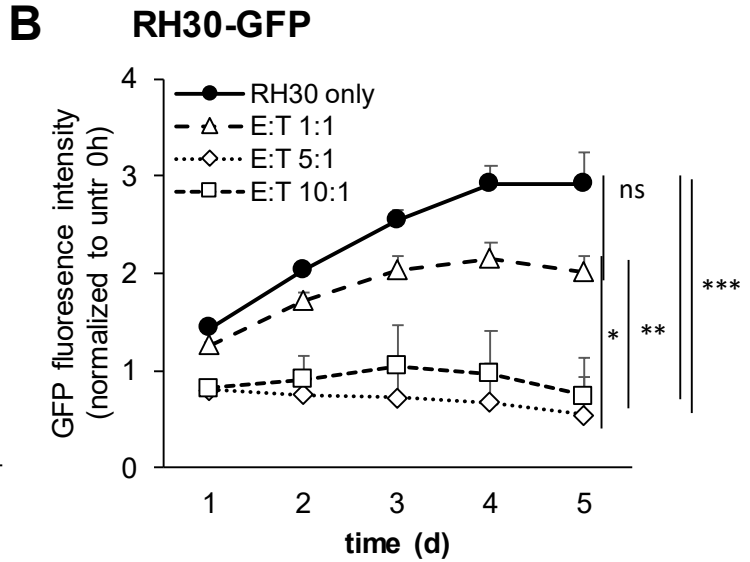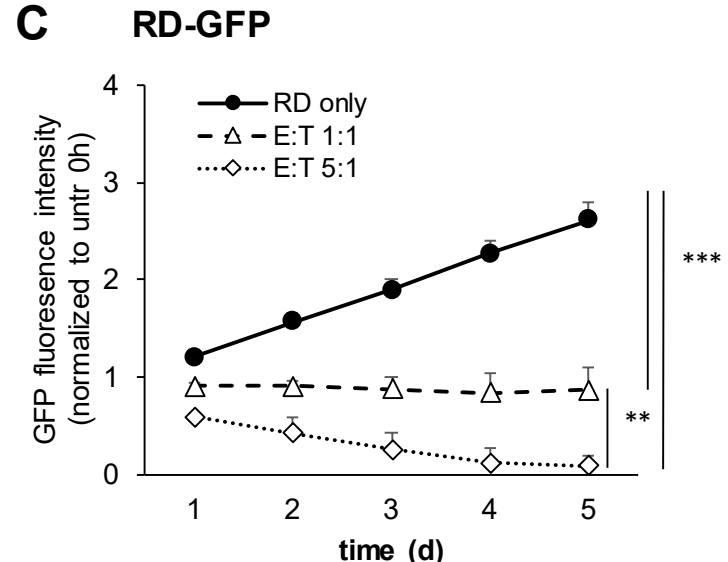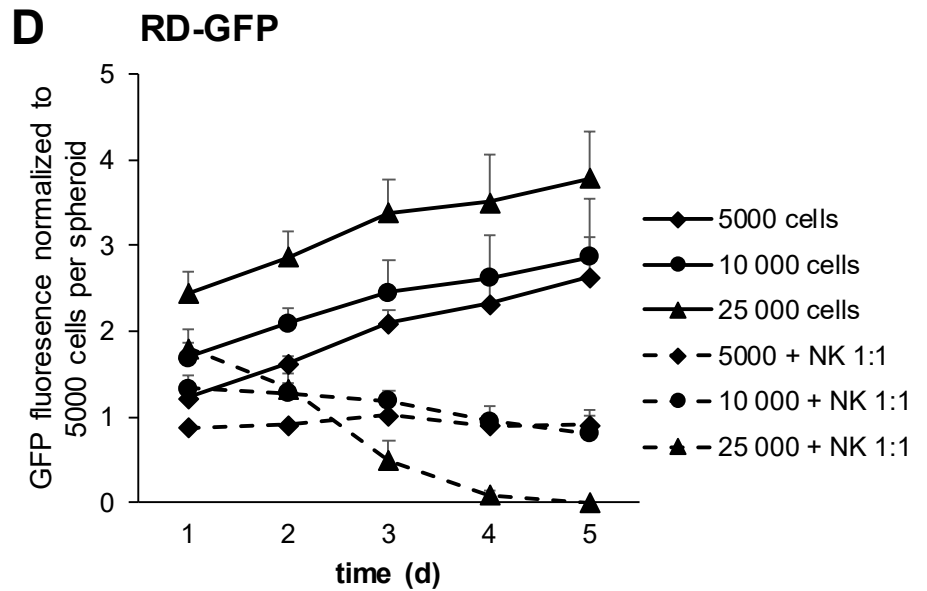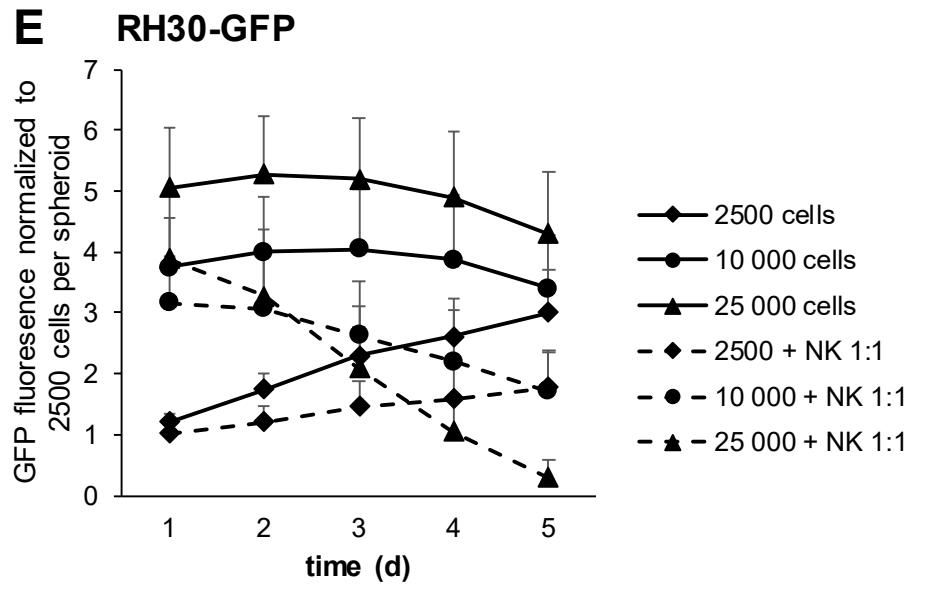

# Supplementary Figure 6

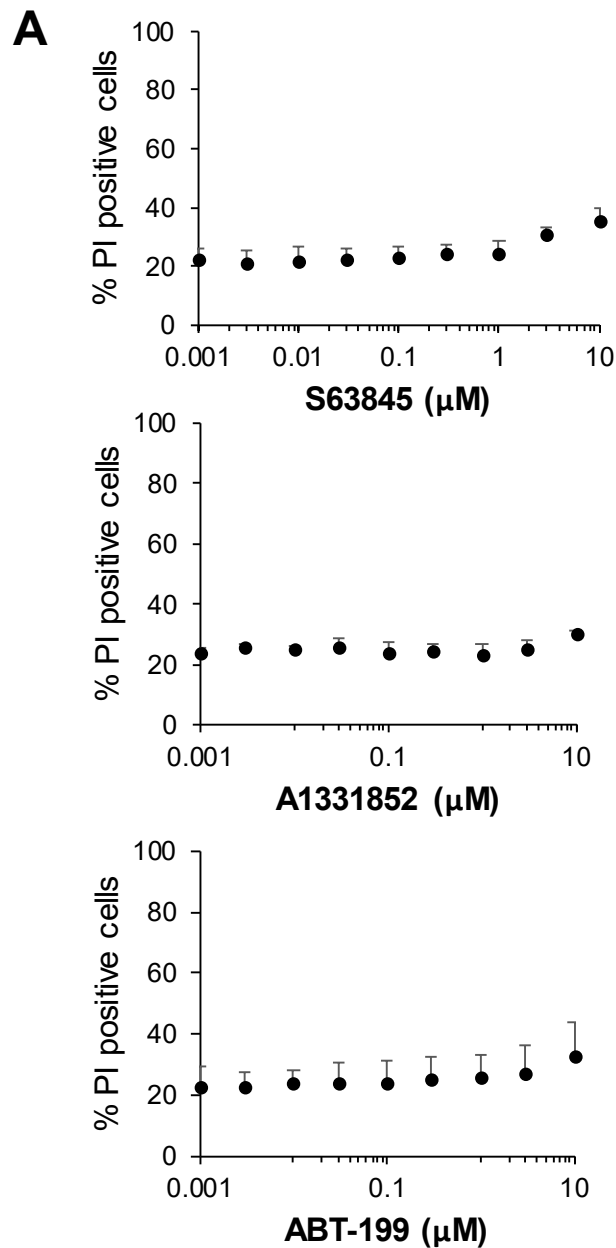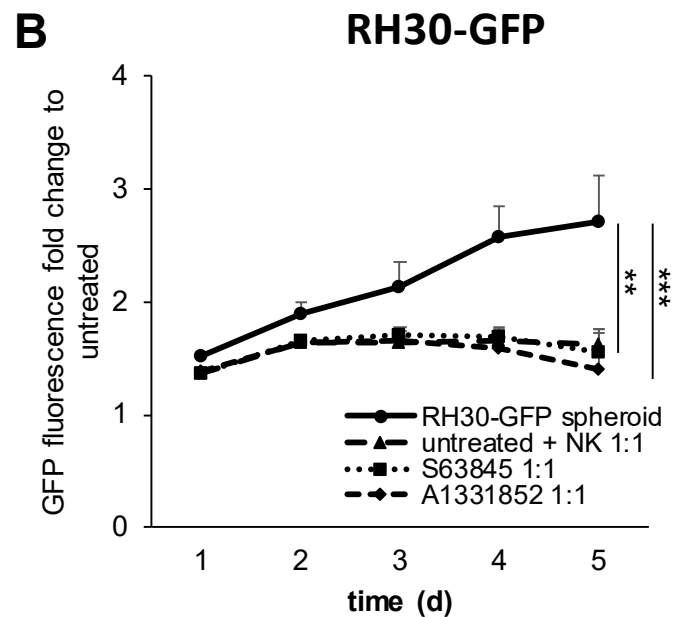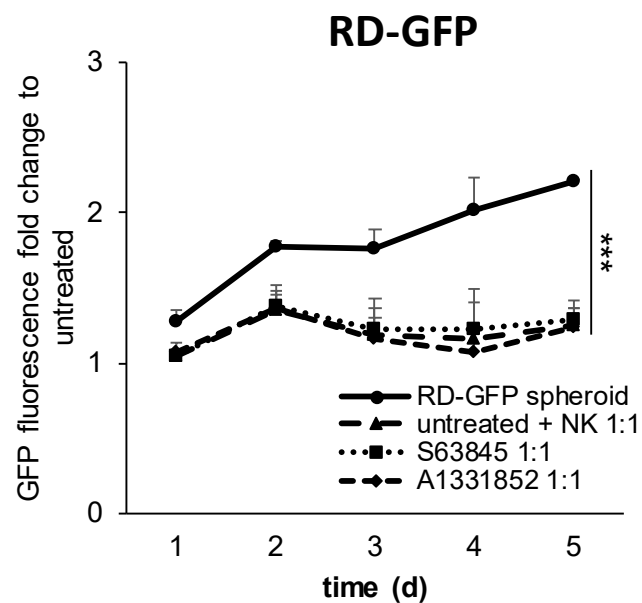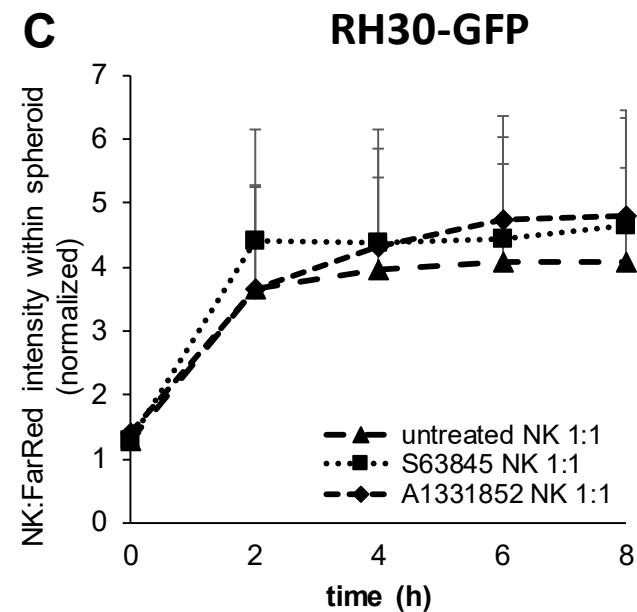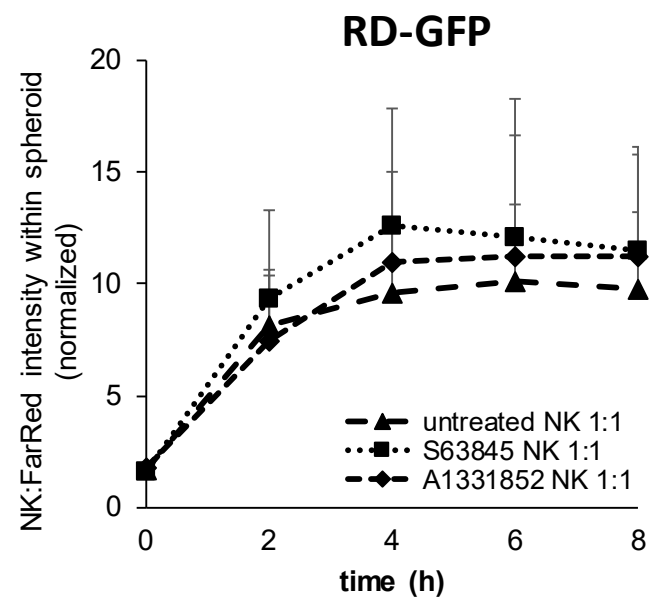

# Supplementary Figure 7

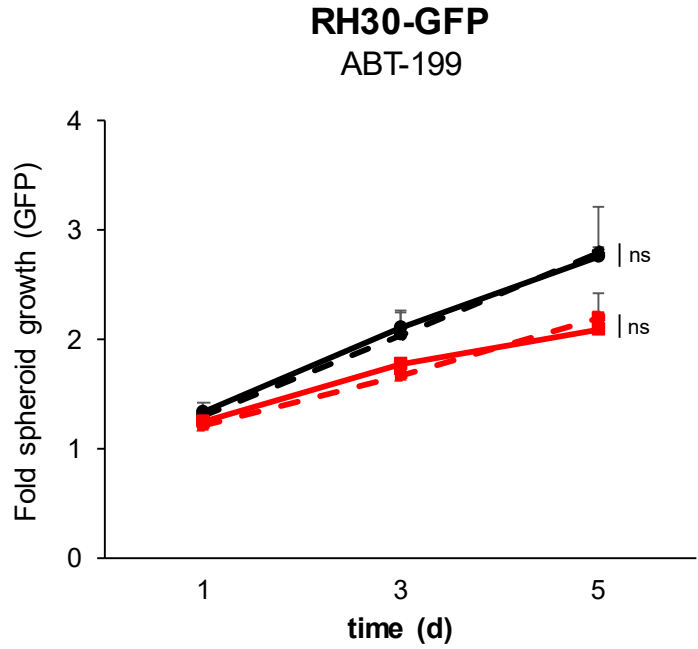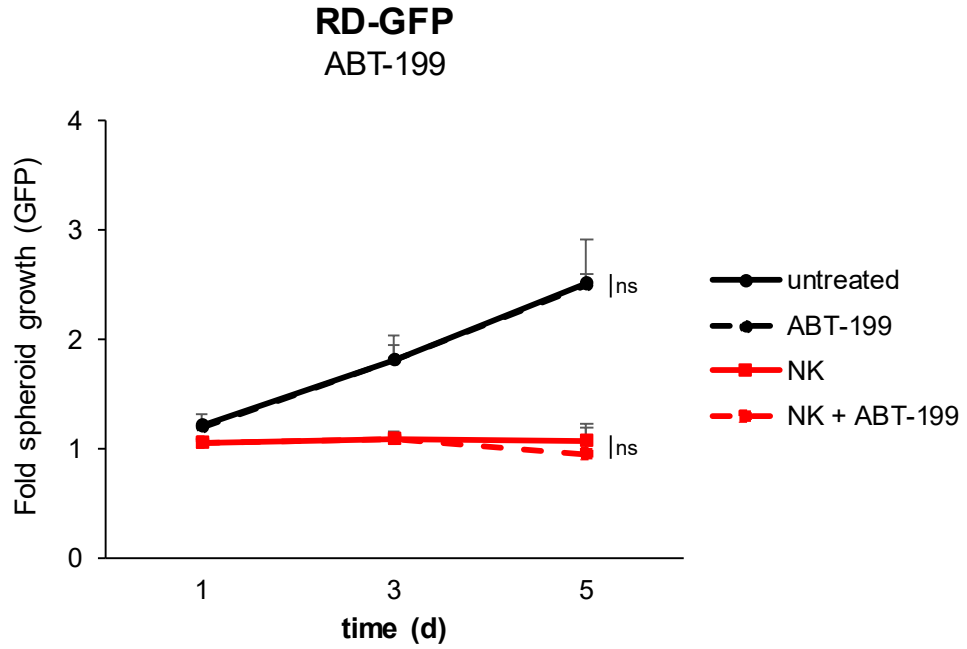

# Supplementary Figure 8

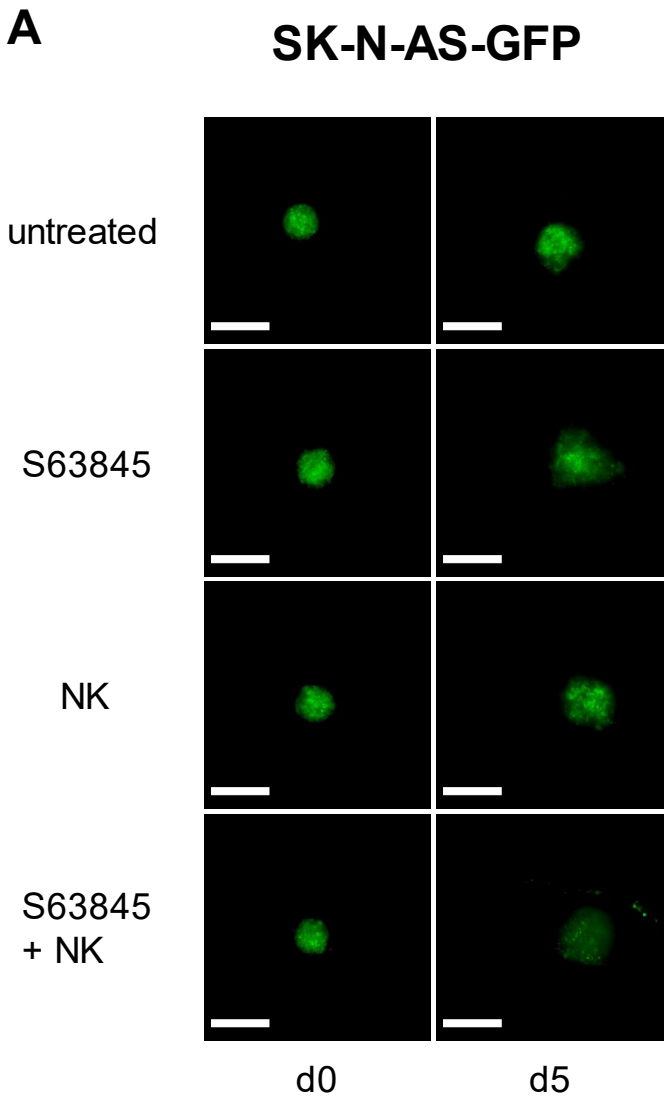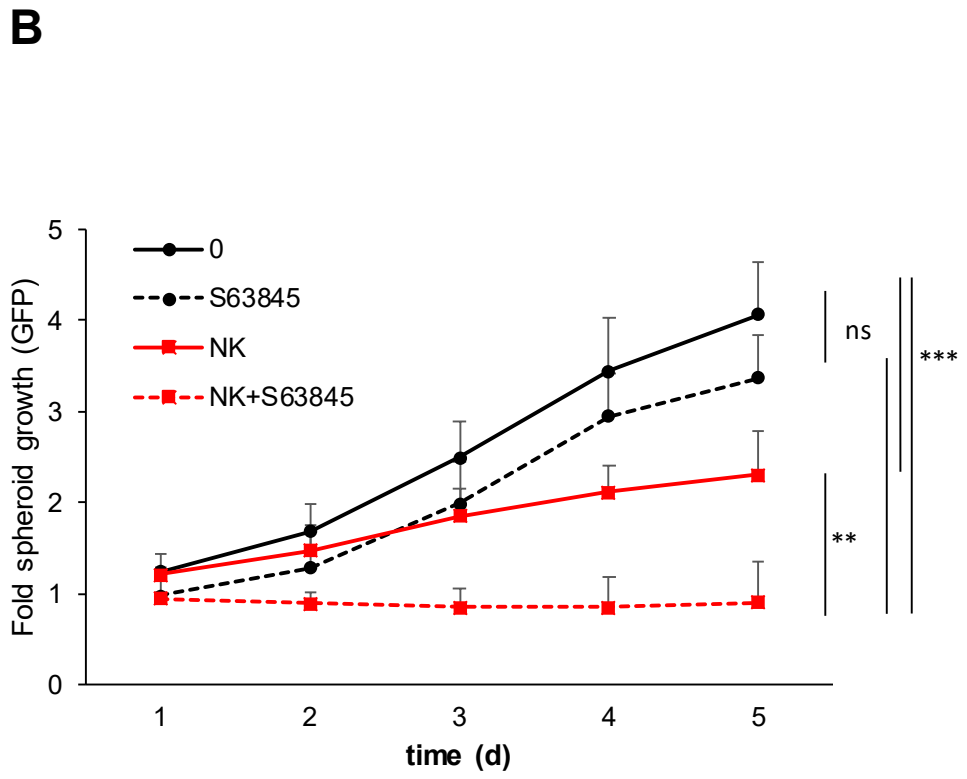



# Supplementary Figure 9

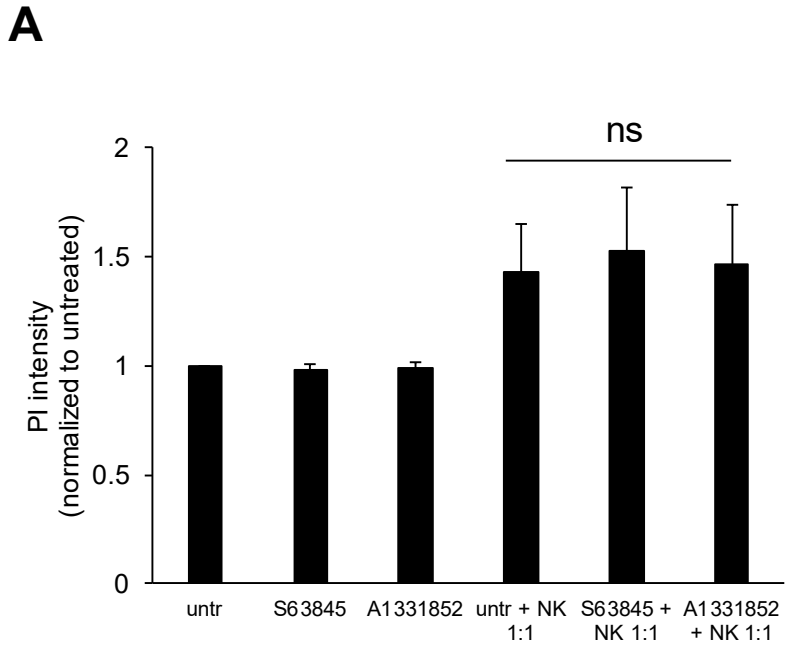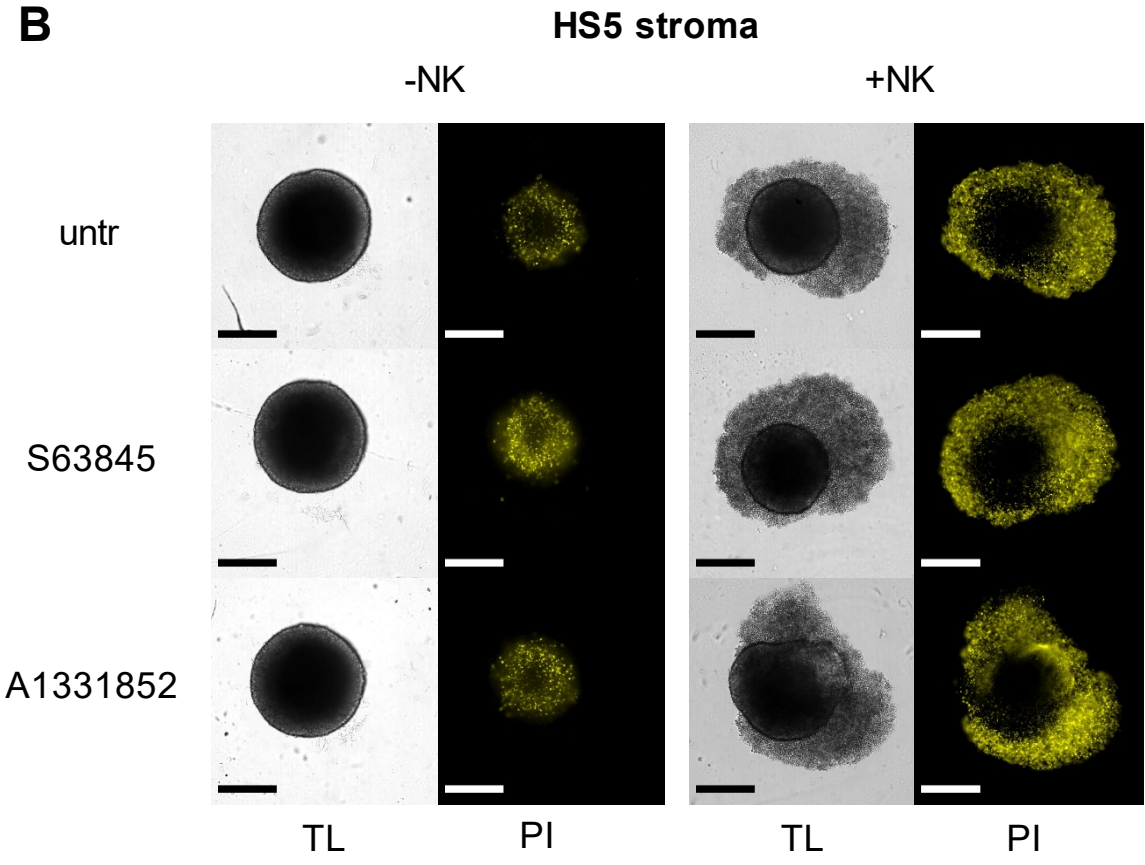

# Supplementary Figure 10

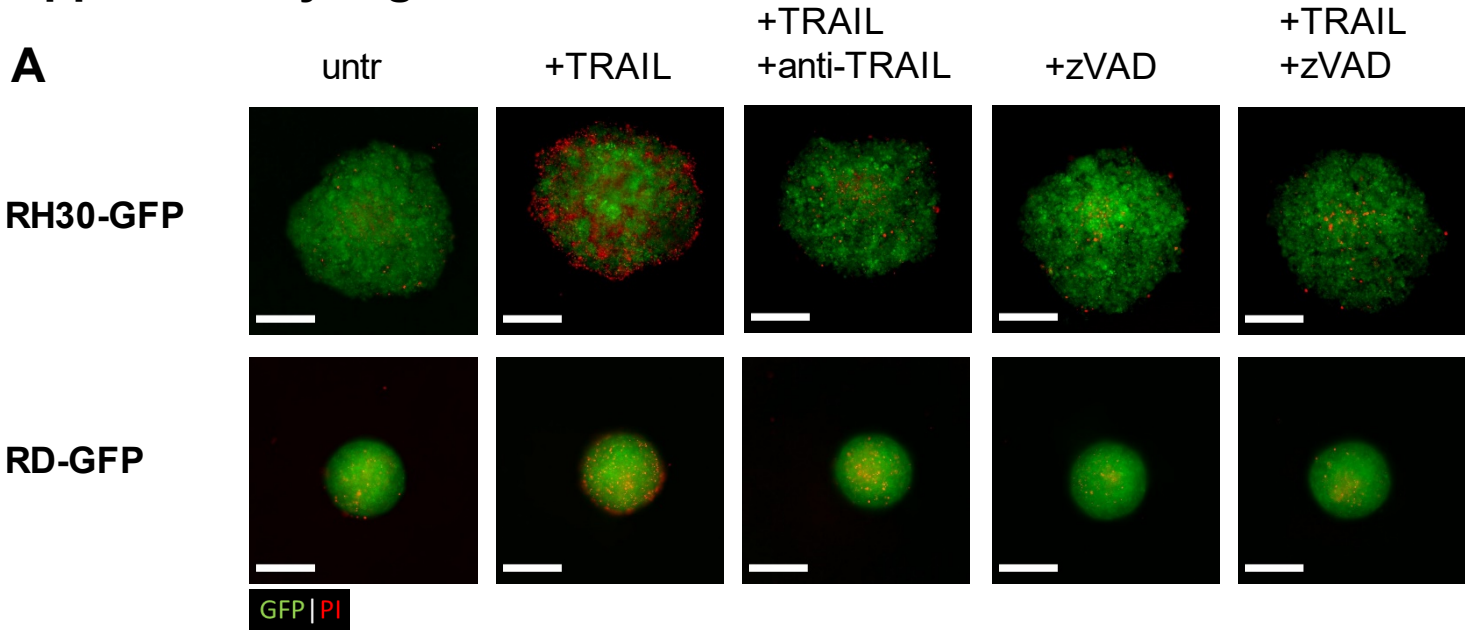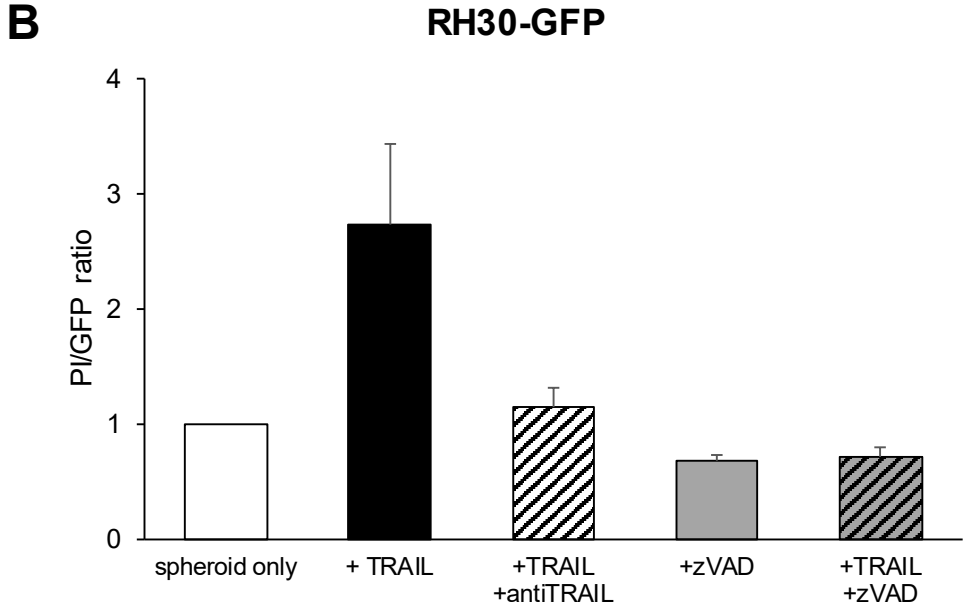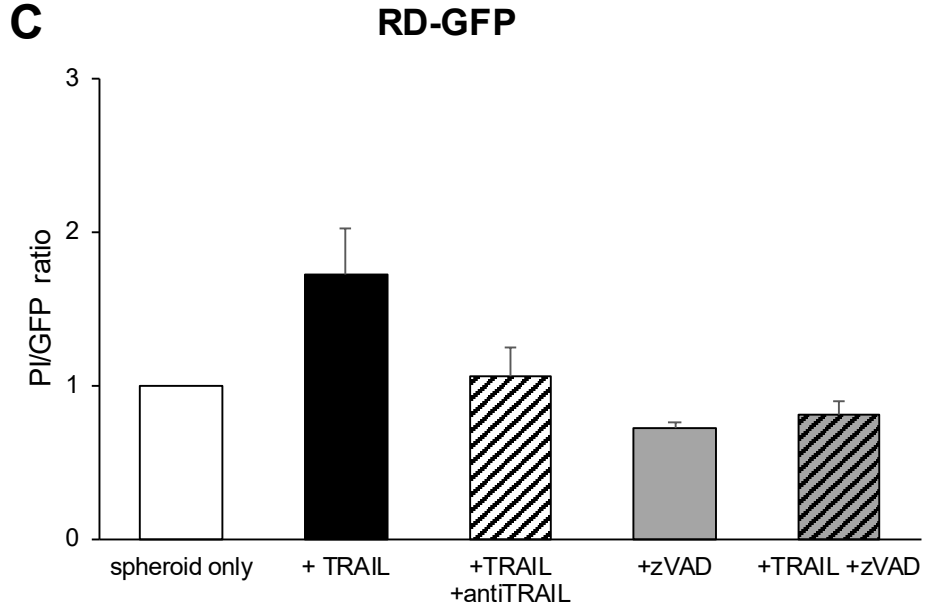

Supplement: MOESM5 [file 41420_2021_812_MOESM5_ESM.pdf]
