# Supplementary material for: Pediatric multicellular tumor spheroid models illustrate a therapeutic potential by combining BH3 mimetics with Natural Killer (NK) cell-based immunotherapy
Source: Springer Nature journal article supplement (doi:10.1038/s41420-021-00812-6), 2022-01-10
Supplement: MOESM1 [file 41420_2021_812_MOESM1_ESM.pdf]

Dear Meike,

I agree to the change in authorship.

Viele Grüße,

Carsten

Am 13.12.2021 um 09:42 schrieb Dr. Meike Vogler <m.vogler@kinderkrebsstiftung-frankfurt.de>:

Dear all,

the journal CDDisc would like us all to approve the addition of Sara Wiedemann as additional author to our manuscript. Sara is a new colleague who has helped us with the experiments during the revision. This confirmation is a common formality required when you add authors during revisions.

**Could I please ask you all to reply to this email stating that you agree to the change in authorship as per the journal's instructions below?**

"It has come to our attention that your most recent author list differs from the one in your original submission. We find that the following authors have been added since your initial submission: Sara Wiedemann

Please request agreement from all authors including additions and deletions, these can be collected in the following way:

Email your co-authors with the change, and ask them to reply to your email confirming that they agree to these changes. Once you have collected these replies, please combine all of the co-authors' email responses in one document and upload this file to your submission."

Thanks a lot,

Meike

---

Dr. Meike Vogler

Laborleitung  
Institut für Experimentelle Tumorforschung in der Pädiatrie  
Goethe-Universität Frankfurt  
Im Dr. Petra Joh-Haus der Frankfurter Stiftung für krebskranke Kinder  
Konturstraße 3a  
60528 Frankfurt a. M.  
Tel.: 069 678 665 -74  
E-Mail: m.vogler@kinderkrebsstiftung-frankfurt.de  
Internet: <http://www.kinderkrebsstiftung-frankfurt.de>

To: v.saerchen@kinderkrebsstiftung-frankfurt.de  
s.shanmugalingam@kinderkrebsstiftung-frankfurt.de  
maureenjacob@gmx.net

sarahkehr@gmx.de  
LisaMarie.Reindl@kgu.de  
Sibylle.Wehter@kgu.de  
Victoria.Greze@kgu.de  
c.boedicker@kinderkrebsstiftung-frankfurt.de  
Katrin.Bankov@kgu.de  
Nina.Becker@kgu.de  
Till-Martin.Theilen@kgu.de  
steffen.gretser@kgu.de  
Elise.Gradhand@kgu.de  
carsten.kummerow@gmail.com  
Evelyn.Ullrich@kgu.de  
s.wiedemann@kinderkrebsstiftung-frankfurt.de

Dear Meike,

I agree with the change of authors.

Best,

Cathinka

---

Original Message processed by david®

**CDDISCOVERY-21-2714R1 - Confirmation of authorship** December/13 2021, 09:42 AM

**Von** [Dr. Meike Vogler](#)

**An** (16) [Vinzenz Särchen](#) | [Senthana Shanmugalingam](#) | [maureenjacob@gmx.net](#) | [Sarah Kehr](#) | [LisaMarie.Reindl@kgu.de](#) | [sibylle.wehner@kgu.de](#) | [Victoria.Greze@kgu.de](#) | [Cathinka Boedicker](#) | [Katrin.Bankov@kgu.de](#) | [Nina.Becker@kgu.de](#) | [Theilen, Till](#) | [steffen.gretser@kgu.de](#) | [Elise.Gradhand@kgu.de](#) | [carsten.kummerow@gmail.com](#) | [Evelyn.Ullrich@kgu.de](#) | [Sara Wiedemann](#)

Hohe Priorität

Dear all,

the journal CDDisc would like us all to approve the addition of Sara Wiedemann as additional author to our manuscript. Sara is a new colleague who has helped us with the experiments during the revision. This confirmation is a common formality required when you add authors during revisions.

**Could I please ask you all to reply to this email stating that you agree to the change in authorship as per the journal's instructions below?**

"It has come to our attention that your most recent author list differs from the one in your original submission. We find that the following authors have been added since your initial submission: Sara Wiedemann

Please request agreement from all authors including additions and deletions, these can be collected in the following way:

Email your co-authors with the change, and ask them to reply to your email confirming that they agree to these changes. Once you have collected these replies, please combine all of the co-authors' email responses in one document and upload this file to your submission."

Thanks a lot,

Meike

---

Dr. Meike Vogler

Laborleitung

Institut für Experimentelle Tumorforschung in der Pädiatrie

Goethe-Universität Frankfurt

Im Dr. Petra Joh-Haus der Frankfurter Stiftung für krebskranke Kinder

Komturstraße 3a

60528 Frankfurt a. M.

Tel.: 069 678 665 -74

E-Mail: [m.vogler@kinderkrebsstiftung-frankfurt.de](mailto:m.vogler@kinderkrebsstiftung-frankfurt.de)

Internet: <http://www.kinderkrebsstiftung-frankfurt.de>

To: [v.saerchen@kinderkrebsstiftung-frankfurt.de](mailto:v.saerchen@kinderkrebsstiftung-frankfurt.de)  
[s.shanmugalingam@kinderkrebsstiftung-frankfurt.de](mailto:s.shanmugalingam@kinderkrebsstiftung-frankfurt.de)  
[maureenjacob@gmx.net](mailto:maureenjacob@gmx.net)  
[sarahkehr@gmx.de](mailto:sarahkehr@gmx.de)  
[LisaMarie.Reindl@kgu.de](mailto:LisaMarie.Reindl@kgu.de)  
[Sibylle.Weohner@kgu.de](mailto:Sibylle.Weohner@kgu.de)  
[Victoria.Greze@kgu.de](mailto:Victoria.Greze@kgu.de)  
[c.boedicker@kinderkrebsstiftung-frankfurt.de](mailto:c.boedicker@kinderkrebsstiftung-frankfurt.de)  
[Katrin.Bankov@kgu.de](mailto:Katrin.Bankov@kgu.de)  
[Nina.Becker@kgu.de](mailto:Nina.Becker@kgu.de)  
[Till-Martin.Theilen@kgu.de](mailto:Till-Martin.Theilen@kgu.de)  
[steffen.gretser@kgu.de](mailto:steffen.gretser@kgu.de)  
[Elise.Gradhand@kgu.de](mailto:Elise.Gradhand@kgu.de)  
[carsten.kummerow@gmail.com](mailto:carsten.kummerow@gmail.com)  
[Evelyn.Ullrich@kgu.de](mailto:Evelyn.Ullrich@kgu.de)  
[s.wiedemann@kinderkrebsstiftung-frankfurt.de](mailto:s.wiedemann@kinderkrebsstiftung-frankfurt.de)

To whom it may concern

I agree to the change of authorship and therefore I am happy that Sara Wiedemann is added to our author's list.

Kind regards

Elise Gradhand

**Dr. med. Elise Gradhand, FRCPath (Paeds)**

FÄ für Pathologie mit Subspezialisierung in Kinder- und Perinatalpathologie

Geschäftsführende Oberärztin

Sektionsleiterin Kinder- und Perinatalpathologie

Dr. Senckenberg. Institut für Pathologie

Universitätsklinikum Frankfurt/Main

Theodor-Stern-Kai 7

60590 Frankfurt

Telefon direkt: +49 69 6301-85699

Telefon: +049 69 6301-5129 (Sekretariat)

Fax: +49 69 6301-7833 (Sekretariat)

elise.gradhand@kgu.de

---

**Von:** Dr. Meike Vogler <m.vogler@kinderkrebsstiftung-frankfurt.de>

**Gesendet:** Montag, 13. Dezember 2021 09:42

**An:** Vinzenz Särchen <v.saerchen@kinderkrebsstiftung-frankfurt.de>; Senthana Shanmugalingam <s.shanmugalingam@kinderkrebsstiftung-frankfurt.de>; maureenjacob@gmx.net; Sarah Kehr <sarahkehr@gmx.de>; Reindl, Lisa Marie <LisaMarie.Reindl@kgu.de>; Wehner, Sibylle <Sibylle.Wehner@kgu.de>; Greze, Victoria <Victoria.Greze@kgu.de>; Cathinka Boedicker <c.boedicker@kinderkrebsstiftung-frankfurt.de>; Bankov, Katrin <Katrin.Bankov@kgu.de>; Becker, Nina <Nina.Becker@kgu.de>; Theilen, Till <Till-Martin.Theilen@kgu.de>; Gretser, Steffen <Steffen.Gretser@kgu.de>; Gradhand, Elise Dr. <Elise.Gradhand@kgu.de>; carsten.kummerow@gmail.com; Ullrich, Evelyn Prof. Dr. <Evelyn.Ullrich@kgu.de>; Sara Wiedemann <s.wiedemann@kinderkrebsstiftung-frankfurt.de>

**Betreff:** CDDISCOVERY-21-2714R1 - Confirmation of authorship

**Priorität:** Hoch

Dear all,

the journal CDDisc would like us all to approve the addition of Sara Wiedemann as additional author to our manuscript. Sara is a new colleague who has helped us with the experiments during the revision. This confirmation is a common formality required when you add authors during revisions.

**Could I please ask you all to reply to this email stating that you agree to the change in authorship as per the journal's instructions below?**

"It has come to our attention that your most recent author list differs from the one in your original submission. We find that the following authors have been added since your initial submission: Sara Wiedemann

Please request agreement from all authors including additions and deletions, these can be collected in the following way:

Email your co-authors with the change, and ask them to reply to your email confirming that they agree to these changes. Once you have collected these replies, please combine all of the co-authors' email responses in one document and upload this file to your submission."

Thanks a lot,

Meike

---

Dr. Meike Vogler

Laborleitung

Institut für Experimentelle Tumorforschung in der Pädiatrie

Goethe-Universität Frankfurt

Im Dr. Petra Joh-Haus der Frankfurter Stiftung für krebskranke Kinder

Komturstraße 3a

60528 Frankfurt a. M.

Tel.: 069 678 665 -74

E-Mail: [m.vogler@kinderkrebsstiftung-frankfurt.de](mailto:m.vogler@kinderkrebsstiftung-frankfurt.de)

Internet: <https://ddei3-0-ctp.trendmicro.com:443/wis/clicktime/v1/query?url=http%3a%2f%2fwww.kinderkrebsstiftung%2dfrankfurt.de&umid=D9E427C5-D303-0D05-A5D8-02D8D8301319&auth=0add78fbf5bb9f3932276e031687124c15a6990b-2544aa0cbd40e86216140a1096c41935b2e88584>

To: [v.saerchen@kinderkrebsstiftung-frankfurt.de](mailto:v.saerchen@kinderkrebsstiftung-frankfurt.de)  
[s.shanmugalingam@kinderkrebsstiftung-frankfurt.de](mailto:s.shanmugalingam@kinderkrebsstiftung-frankfurt.de)  
[maureenjacob@gmx.net](mailto:maureenjacob@gmx.net)  
[sarahkehr@gmx.de](mailto:sarahkehr@gmx.de)  
[LisaMarie.Reindl@kgu.de](mailto:LisaMarie.Reindl@kgu.de)  
[Sibylle.Wechner@kgu.de](mailto:Sibylle.Wechner@kgu.de)  
[Victoria.Greze@kgu.de](mailto:Victoria.Greze@kgu.de)  
[c.boedicker@kinderkrebsstiftung-frankfurt.de](mailto:c.boedicker@kinderkrebsstiftung-frankfurt.de)  
[Katrin.Bankov@kgu.de](mailto:Katrin.Bankov@kgu.de)

[Nina.Becker@kgu.de](mailto:Nina.Becker@kgu.de)

[Till-Martin.Theilen@kgu.de](mailto:Till-Martin.Theilen@kgu.de)

[steffen.gretser@kgu.de](mailto:steffen.gretser@kgu.de)

[Elise.Gradhand@kgu.de](mailto:Elise.Gradhand@kgu.de)

[carsten.kummerow@gmail.com](mailto:carsten.kummerow@gmail.com)

[Evelyn.Ullrich@kgu.de](mailto:Evelyn.Ullrich@kgu.de)

[s.wiedemann@kinderkrebsstiftung-frankfurt.de](mailto:s.wiedemann@kinderkrebsstiftung-frankfurt.de)

Dear Meike,  
herewith, I agree to the change in authorship as submitted on the revised version.  
Best regards,  
Evelyn

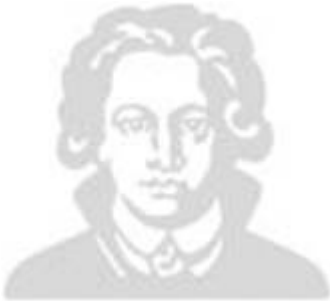

**Univ.-Prof. Dr. med.**  
**Evelyn Ullrich**

**Universitätsklinikum Frankfurt**  
Klinik für Kinder- und Jugendmedizin  
Experimentelle Immunologie  
Johanna Quandt Zentrum  
Theodor-Stern-Kai 7 / Haus 32E / R209E  
D-60590 Frankfurt

Sekretariat: +49 69 6301-7126  
Büro: +49 69 6301-83000  
Mobil: +49 151-1719-1871  
Intern : 179-1631

Mail: [evelyn.ullrich@kgu.de](mailto:evelyn.ullrich@kgu.de)  
Web: [Experimental Immunology](#)

---

**Von:** Dr. Meike Vogler <m.vogler@kinderkrebsstiftung-frankfurt.de>

**Gesendet:** Montag, 13. Dezember 2021 09:42

**An:** Vinzenz Särchen <v.saerchen@kinderkrebsstiftung-frankfurt.de>; Senthana Shanmugalingam <s.shanmugalingam@kinderkrebsstiftung-frankfurt.de>; maureenjacob@gmx.net; Sarah Kehr <sarahkehr@gmx.de>; Reindl, Lisa Marie <LisaMarie.Reindl@kgu.de>; Wehner, Sibylle <Sibylle.Wehner@kgu.de>; Greze, Victoria <Victoria.Greze@kgu.de>; Cathinka Boedicker <c.boedicker@kinderkrebsstiftung-frankfurt.de>; Bankov, Katrin <Katrin.Bankov@kgu.de>; Becker, Nina <Nina.Becker@kgu.de>; Theilen, Till <Till-Martin.Theilen@kgu.de>; Gretser, Steffen <Steffen.Gretser@kgu.de>; Gradhand, Elise Dr. <Elise.Gradhand@kgu.de>; carsten.kummerow@gmail.com; Ullrich, Evelyn Prof. Dr. <Evelyn.Ullrich@kgu.de>; Sara Wiedemann <s.wiedemann@kinderkrebsstiftung-frankfurt.de>

**Betreff:** CDDISCOVERY-21-2714R1 - Confirmation of authorship

**Priorität:** Hoch



Dear all,

the journal CDDisc would like us all to approve the addition of Sara Wiedemann as additional author to our manuscript. Sara is a new colleague who has helped us with the experiments during the revision. This confirmation is a common formality required when you add authors during revisions.

**Could I please ask you all to reply to this email stating that you agree to the change in authorship as per the journal's instructions below?**

"It has come to our attention that your most recent author list differs from the one in your original submission. We find that the following authors have been added since your initial submission: Sara Wiedemann

Please request agreement from all authors including additions and deletions, these can be collected in the following way:

Email your co-authors with the change, and ask them to reply to your email confirming that they agree to these changes. Once you have collected these replies, please combine all of the co-authors' email responses in one document and upload this file to your submission."

Thanks a lot,

Meike

---

Dr. Meike Vogler

Laborleitung

Institut für Experimentelle Tumorforschung in der Pädiatrie

Goethe-Universität Frankfurt

Im Dr. Petra Joh-Haus der Frankfurter Stiftung für krebskranke Kinder

Komturstraße 3a

60528 Frankfurt a. M.

Tel.: 069 678 665 -74

E-Mail: [m.vogler@kinderkrebsstiftung-frankfurt.de](mailto:m.vogler@kinderkrebsstiftung-frankfurt.de)

Internet: [https://ddei3-0-ctp.trendmicro.com:443/wis/clicktime/v1/query?](https://ddei3-0-ctp.trendmicro.com:443/wis/clicktime/v1/query?url=http%3a%2f%2fwww.kinderkrebsstiftung%2dfrankfurt.de&umid=D9DFCBDA-D303-0D05-832B-2DB2CDD33201&auth=0add78fbf5bb9f3932276e031687124c15a6990b-fda18de959e82438966c8c8ba26a2319a9f9f536)

[url=http%3a%2f%2fwww.kinderkrebsstiftung%2dfrankfurt.de&umid=D9DFCBDA-D303-0D05-832B-2DB2CDD33201&auth=0add78fbf5bb9f3932276e031687124c15a6990b-fda18de959e82438966c8c8ba26a2319a9f9f536](http%3a%2f%2fwww.kinderkrebsstiftung%2dfrankfurt.de&umid=D9DFCBDA-D303-0D05-832B-2DB2CDD33201&auth=0add78fbf5bb9f3932276e031687124c15a6990b-fda18de959e82438966c8c8ba26a2319a9f9f536)

To: [v.saerchen@kinderkrebsstiftung-frankfurt.de](mailto:v.saerchen@kinderkrebsstiftung-frankfurt.de)  
[s.shanmugalingam@kinderkrebsstiftung-frankfurt.de](mailto:s.shanmugalingam@kinderkrebsstiftung-frankfurt.de)  
[maureenjacob@gmx.net](mailto:maureenjacob@gmx.net)  
[sarahkehr@gmx.de](mailto:sarahkehr@gmx.de)  
[LisaMarie.Reindl@kgu.de](mailto:LisaMarie.Reindl@kgu.de)  
[Sibylle.Wechner@kgu.de](mailto:Sibylle.Wechner@kgu.de)  
[Victoria.Greze@kgu.de](mailto:Victoria.Greze@kgu.de)  
[c.boedicker@kinderkrebsstiftung-frankfurt.de](mailto:c.boedicker@kinderkrebsstiftung-frankfurt.de)  
[Katrin.Bankov@kgu.de](mailto:Katrin.Bankov@kgu.de)  
[Nina.Becker@kgu.de](mailto:Nina.Becker@kgu.de)  
[Till-Martin.Theilen@kgu.de](mailto:Till-Martin.Theilen@kgu.de)  
[steffen.gretser@kgu.de](mailto:steffen.gretser@kgu.de)  
[Elise.Gradhand@kgu.de](mailto:Elise.Gradhand@kgu.de)  
[carsten.kummerow@gmail.com](mailto:carsten.kummerow@gmail.com)  
[Evelyn.Ullrich@kgu.de](mailto:Evelyn.Ullrich@kgu.de)  
[s.wiedemann@kinderkrebsstiftung-frankfurt.de](mailto:s.wiedemann@kinderkrebsstiftung-frankfurt.de)

To whom it may concern,

I hereby agree to the change in authorship by adding Sara Wiedemann.

With kind regards,

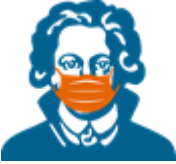

Dr. phil. nat. Dipl. Ing.

**Katrin Bankov**

Leitung Senckenberg Biobank

**Universitätsklinikum Frankfurt**

Dr. Senckenberg. Institut für Pathologie

Senckenberg BioBank (SBB)

Theodor-Stern-Kai 7

D-60590 Frankfurt

Telefon: +49 69 6301-5387

Fax: +49 69 6301-5456

Mail: [katrin.bankov@kgu.de](mailto:katrin.bankov@kgu.de)

[sbb.pathologie@kgu.de](mailto:sbb.pathologie@kgu.de)

Web: [www.kgu.de](http://www.kgu.de)

---

**Von:** Dr. Meike Vogler [<mailto:m.vogler@kinderkrebsstiftung-frankfurt.de>]

**Gesendet:** Montag, 13. Dezember 2021 09:42

**An:** Vinzenz Särchen <[v.saerchen@kinderkrebsstiftung-frankfurt.de](mailto:v.saerchen@kinderkrebsstiftung-frankfurt.de)>; Senthana Shanmugalingam <[s.shanmugalingam@kinderkrebsstiftung-frankfurt.de](mailto:s.shanmugalingam@kinderkrebsstiftung-frankfurt.de)>; maureenjacob@gmx.net; Sarah Kehr <[sarahkehr@gmx.de](mailto:sarahkehr@gmx.de)>; Reindl, Lisa Marie <[LisaMarie.Reindl@kgu.de](mailto:LisaMarie.Reindl@kgu.de)>; Wehner, Sibylle <[Sibylle.Wehner@kgu.de](mailto:Sibylle.Wehner@kgu.de)>; Greze, Victoria <[Victoria.Greze@kgu.de](mailto:Victoria.Greze@kgu.de)>; Cathinka Boedicker <[c.boedicker@kinderkrebsstiftung-frankfurt.de](mailto:c.boedicker@kinderkrebsstiftung-frankfurt.de)>; Bankov, Katrin <[Katrin.Bankov@kgu.de](mailto:Katrin.Bankov@kgu.de)>; Becker, Nina <[Nina.Becker@kgu.de](mailto:Nina.Becker@kgu.de)>; Theilen, Till <[Till-Martin.Theilen@kgu.de](mailto:Till-Martin.Theilen@kgu.de)>; Gretser, Steffen <[Steffen.Gretser@kgu.de](mailto:Steffen.Gretser@kgu.de)>; Gradhand, Elise Dr. <[Elise.Gradhand@kgu.de](mailto:Elise.Gradhand@kgu.de)>; carsten.kummerow@gmail.com; Ullrich, Evelyn Prof. Dr. <[Evelyn.Ullrich@kgu.de](mailto:Evelyn.Ullrich@kgu.de)>; Sara Wiedemann <[s.wiedemann@kinderkrebsstiftung-frankfurt.de](mailto:s.wiedemann@kinderkrebsstiftung-frankfurt.de)>

**Betreff:** CDDISCOVERY-21-2714R1 - Confirmation of authorship

**Priorität:** Hoch

Dear all,

the journal CDDisc would like us all to approve the addition of Sara Wiedemann as additional author to our manuscript. Sara is a new colleague who has helped us with the experiments during the revision. This confirmation is a common formality required when you add authors during revisions.

**Could I please ask you all to reply to this email stating that you agree to the change in authorship as per the journal's instructions below?**

"It has come to our attention that your most recent author list differs from the one in your original submission. We find that the following authors have been added since your initial submission: Sara Wiedemann

Please request agreement from all authors including additions and deletions, these can be collected in the following way:

Email your co-authors with the change, and ask them to reply to your email confirming that they agree to these changes. Once you have collected these replies, please combine all of the co-authors' email responses in one document and upload this file to your submission."

Thanks a lot,

Meike

---

Dr. Meike Vogler

Laborleitung

Institut für Experimentelle Tumorforschung in der Pädiatrie

Goethe-Universität Frankfurt

Im Dr. Petra Joh-Haus der Frankfurter Stiftung für krebskranke Kinder

Komturststraße 3a

60528 Frankfurt a. M.

Tel.: 069 678 665 -74

E-Mail: [m.vogler@kinderkrebsstiftung-frankfurt.de](mailto:m.vogler@kinderkrebsstiftung-frankfurt.de)

Internet: <https://ddei3-0-ctp.trendmicro.com:443/wis/clicktime/v1/query?url=http%3a%2f%2fwww.kinderkrebsstiftung%2dfrankfurt.de&umid=D9DDAE61-D303-0D05-AFC9-4290FE21C90C&auth=0add78bf5bb9f3932276e031687124c15a6990b-2dc9191b0576fb7aae64cdda90bbac686295284c>

To: [v.saerchen@kinderkrebsstiftung-frankfurt.de](mailto:v.saerchen@kinderkrebsstiftung-frankfurt.de)  
[s.shanmugalingam@kinderkrebsstiftung-frankfurt.de](mailto:s.shanmugalingam@kinderkrebsstiftung-frankfurt.de)  
[maureenjacob@gmx.net](mailto:maureenjacob@gmx.net)  
[sarahkehr@gmx.de](mailto:sarahkehr@gmx.de)  
[LisaMarie.Reindl@kgu.de](mailto:LisaMarie.Reindl@kgu.de)  
[Sibylle.Wechner@kgu.de](mailto:Sibylle.Wechner@kgu.de)  
[Victoria.Greze@kgu.de](mailto:Victoria.Greze@kgu.de)  
[c.boedicker@kinderkrebsstiftung-frankfurt.de](mailto:c.boedicker@kinderkrebsstiftung-frankfurt.de)  
[Katrin.Bankov@kgu.de](mailto:Katrin.Bankov@kgu.de)

[Nina.Becker@kgu.de](mailto:Nina.Becker@kgu.de)

[Till-Martin.Theilen@kgu.de](mailto:Till-Martin.Theilen@kgu.de)

[steffen.gretser@kgu.de](mailto:steffen.gretser@kgu.de)

[Elise.Gradhand@kgu.de](mailto:Elise.Gradhand@kgu.de)

[carsten.kummerow@gmail.com](mailto:carsten.kummerow@gmail.com)

[Evelyn.Ullrich@kgu.de](mailto:Evelyn.Ullrich@kgu.de)

[s.wiedemann@kinderkrebsstiftung-frankfurt.de](mailto:s.wiedemann@kinderkrebsstiftung-frankfurt.de)

Dear Meike,

I agree to the change in authorship.

Best regards,

Lisa Marie

---

**Von:** Dr. Meike Vogler [mailto:m.vogler@kinderkrebsstiftung-frankfurt.de]

**Gesendet:** Montag, 13. Dezember 2021 09:42

**An:** Vinzenz Särchen <v.saerchen@kinderkrebsstiftung-frankfurt.de>; Senthana Shanmugalingam <s.shanmugalingam@kinderkrebsstiftung-frankfurt.de>; maureenjacob@gmx.net; Sarah Kehr <sarahkehr@gmx.de>; Reindl, Lisa Marie <LisaMarie.Reindl@kgu.de>; Wehner, Sibylle <Sibylle.Wehner@kgu.de>; Greze, Victoria <Victoria.Greze@kgu.de>; Cathinka Boedicker <c.boedicker@kinderkrebsstiftung-frankfurt.de>; Bankov, Katrin <Katrin.Bankov@kgu.de>; Becker, Nina <Nina.Becker@kgu.de>; Theilen, Till <Till-Martin.Theilen@kgu.de>; Gretser, Steffen <Steffen.Gretser@kgu.de>; Gradhand, Elise Dr. <Elise.Gradhand@kgu.de>; carsten.kummerow@gmail.com; Ullrich, Evelyn Prof. Dr. <Evelyn.Ullrich@kgu.de>; Sara Wiedemann <s.wiedemann@kinderkrebsstiftung-frankfurt.de>

**Betreff:** CDDISCOVERY-21-2714R1 - Confirmation of authorship

**Priorität:** Hoch

Dear all,

the journal CDDisc would like us all to approve the addition of Sara Wiedemann as additional author to our manuscript. Sara is a new colleague who has helped us with the experiments during the revision. This confirmation is a common formality required when you add authors during revisions.

**Could I please ask you all to reply to this email stating that you agree to the change in authorship as per the journal's instructions below?**

"It has come to our attention that your most recent author list differs from the one in your original submission. We find that the following authors have been added since your initial submission: Sara Wiedemann

Please request agreement from all authors including additions and deletions, these can be collected in the following way:

Email your co-authors with the change, and ask them to reply to your email confirming that they agree to these changes. Once you have collected these replies, please combine all of the co-authors' email responses in one document and upload this file to your submission."

Thanks a lot,

Meike

---

Dr. Meike Vogler

Laborleitung

Institut für Experimentelle Tumorforschung in der Pädiatrie

Goethe-Universität Frankfurt

Im Dr. Petra Joh-Haus der Frankfurter Stiftung für krebskranke Kinder

Komturstraße 3a

60528 Frankfurt a. M.

Tel.: 069 678 665 -74

E-Mail: [m.vogler@kinderkrebsstiftung-frankfurt.de](mailto:m.vogler@kinderkrebsstiftung-frankfurt.de)

Internet: <https://ddei3-0-ctp.trendmicro.com:443/wis/clicktime/v1/query?url=http%3a%2f%2fwww.kinderkrebsstiftung%2dfrankfurt.de&umid=B6E619E6-D303-0D05-B59E-490EDF553341&auth=0add78bf5bb9f3932276e031687124c15a6990b-c094fb104e593ad66efc467a07801a28c81e5454>

To: [v.saerchen@kinderkrebsstiftung-frankfurt.de](mailto:v.saerchen@kinderkrebsstiftung-frankfurt.de)  
[s.shanmugalingam@kinderkrebsstiftung-frankfurt.de](mailto:s.shanmugalingam@kinderkrebsstiftung-frankfurt.de)  
[maureenjacob@gmx.net](mailto:maureenjacob@gmx.net)  
[sarahkehr@gmx.de](mailto:sarahkehr@gmx.de)  
[LisaMarie.Reindl@kgu.de](mailto:LisaMarie.Reindl@kgu.de)  
[Sibylle.Wechner@kgu.de](mailto:Sibylle.Wechner@kgu.de)  
[Victoria.Greze@kgu.de](mailto:Victoria.Greze@kgu.de)  
[c.boedicker@kinderkrebsstiftung-frankfurt.de](mailto:c.boedicker@kinderkrebsstiftung-frankfurt.de)  
[Katrin.Bankov@kgu.de](mailto:Katrin.Bankov@kgu.de)  
[Nina.Becker@kgu.de](mailto:Nina.Becker@kgu.de)  
[Till-Martin.Theilen@kgu.de](mailto:Till-Martin.Theilen@kgu.de)  
[steffen.gretser@kgu.de](mailto:steffen.gretser@kgu.de)  
[Elise.Gradhand@kgu.de](mailto:Elise.Gradhand@kgu.de)  
[carsten.kummerow@gmail.com](mailto:carsten.kummerow@gmail.com)  
[Evelyn.Ullrich@kgu.de](mailto:Evelyn.Ullrich@kgu.de)  
[s.wiedemann@kinderkrebsstiftung-frankfurt.de](mailto:s.wiedemann@kinderkrebsstiftung-frankfurt.de)

Dear Meike,

I agree with the change of authorship that Sara Wiedemann is added to the author list.

Best,  
Maureen Jacob

Am 13.12.2021 um 09:42 schrieb Dr. Meike Vogler <m.vogler@kinderkrebsstiftung-frankfurt.de>:

Dear all,

the journal CDDisc would like us all to approve the addition of Sara Wiedemann as additional author to our manuscript. Sara is a new colleague who has helped us with the experiments during the revision. This confirmation is a common formality required when you add authors during revisions.

**Could I please ask you all to reply to this email stating that you agree to the change in authorship as per the journal's instructions below?**

"It has come to our attention that your most recent author list differs from the one in your original submission. We find that the following authors have been added since your initial submission: Sara Wiedemann

Please request agreement from all authors including additions and deletions, these can be collected in the following way:

Email your co-authors with the change, and ask them to reply to your email confirming that they agree to these changes. Once you have collected these replies, please combine all of the co-authors' email responses in one document and upload this file to your submission."

Thanks a lot,

Meike

---

Dr. Meike Vogler

Laborleitung  
Institut für Experimentelle Tumorforschung in der Pädiatrie  
Goethe-Universität Frankfurt  
Im Dr. Petra Joh-Haus der Frankfurter Stiftung für krebskranke Kinder  
Konturstraße 3a  
60528 Frankfurt a. M.  
Tel.: 069 678 665 -74  
E-Mail: m.vogler@kinderkrebsstiftung-frankfurt.de  
Internet: <http://www.kinderkrebsstiftung-frankfurt.de>

To: v.saerchen@kinderkrebsstiftung-frankfurt.de  
s.shanmugalingam@kinderkrebsstiftung-frankfurt.de



maureenjacob@gmx.net  
sarahkehr@gmx.de  
LisaMarie.Reindl@kgu.de  
Sibylle.Wehtner@kgu.de  
Victoria.Greze@kgu.de  
c.boedicker@kinderkrebsstiftung-frankfurt.de  
Katrln.Bankov@kgu.de  
Nlna.Becker@kgu.de  
Till-Martin.Theilen@kgu.de  
steffen.gretser@kgu.de  
Elise.Gradhand@kgu.de  
carsten.kummerow@gmail.com  
Evelyn.Ullrich@kgu.de  
s.wiedemann@kinderkrebsstiftung-frankfurt.de

Dear Meike,

I agree to the change in authorship as per the journal's instructions below.

Best regards, Nina Becker

---

**Von:** Dr. Meike Vogler <m.vogler@kinderkrebsstiftung-frankfurt.de>

**Gesendet:** Montag, 13. Dezember 2021 09:42

**An:** Vinzenz Särchen <v.saerchen@kinderkrebsstiftung-frankfurt.de>; Senthana Shanmugalingam <s.shanmugalingam@kinderkrebsstiftung-frankfurt.de>; maureenjacob@gmx.net; Sarah Kehr <sarahkehr@gmx.de>; Reindl, Lisa Marie <LisaMarie.Reindl@kgu.de>; Wehner, Sibylle <Sibylle.Wehner@kgu.de>; Greze, Victoria <Victoria.Greze@kgu.de>; Cathinka Boedicker <c.boedicker@kinderkrebsstiftung-frankfurt.de>; Bankov, Katrin <Katrin.Bankov@kgu.de>; Becker, Nina <Nina.Becker@kgu.de>; Theilen, Till <Till-Martin.Theilen@kgu.de>; Gretser, Steffen <Steffen.Gretser@kgu.de>; Gradhand, Elise Dr. <Elise.Gradhand@kgu.de>; carsten.kummerow@gmail.com; Ullrich, Evelyn Prof. Dr. <Evelyn.Ullrich@kgu.de>; Sara Wiedemann <s.wiedemann@kinderkrebsstiftung-frankfurt.de>

**Betreff:** CDDISCOVERY-21-2714R1 - Confirmation of authorship

**Priorität:** Hoch

Dear all,

the journal CDDisc would like us all to approve the addition of Sara Wiedemann as additional author to our manuscript. Sara is a new colleague who has helped us with the experiments during the revision. This confirmation is a common formality required when you add authors during revisions.

**Could I please ask you all to reply to this email stating that you agree to the change in authorship as per the journal's instructions below?**

"It has come to our attention that your most recent author list differs from the one in your original submission. We find that the following authors have been added since your initial submission: Sara Wiedemann

Please request agreement from all authors including additions and deletions, these can be collected in the following way:

Email your co-authors with the change, and ask them to reply to your email confirming that they agree to these changes. Once you have collected these replies, please combine all of the co-authors' email responses in one document and upload this file to your submission."

Thanks a lot,

Meike

---

Dr. Meike Vogler

Laborleitung

Institut für Experimentelle Tumorforschung in der Pädiatrie

Goethe-Universität Frankfurt

Im Dr. Petra Joh-Haus der Frankfurter Stiftung für krebskranke Kinder

Komturststraße 3a

60528 Frankfurt a. M.

Tel.: 069 678 665 -74

E-Mail: [m.vogler@kinderkrebsstiftung-frankfurt.de](mailto:m.vogler@kinderkrebsstiftung-frankfurt.de)

Internet: <http://www.kinderkrebsstiftung-frankfurt.de>

To: [v.saerchen@kinderkrebsstiftung-frankfurt.de](mailto:v.saerchen@kinderkrebsstiftung-frankfurt.de)  
[s.shanmugalingam@kinderkrebsstiftung-frankfurt.de](mailto:s.shanmugalingam@kinderkrebsstiftung-frankfurt.de)  
[maureenjacob@gmx.net](mailto:maureenjacob@gmx.net)  
[sarahkehr@gmx.de](mailto:sarahkehr@gmx.de)  
[LisaMarie.Reindl@kgu.de](mailto:LisaMarie.Reindl@kgu.de)  
[Sibylle.Wehtner@kgu.de](mailto:Sibylle.Wehtner@kgu.de)  
[Victoria.Greze@kgu.de](mailto:Victoria.Greze@kgu.de)  
[c.boedicker@kinderkrebsstiftung-frankfurt.de](mailto:c.boedicker@kinderkrebsstiftung-frankfurt.de)  
[Katrin.Bankov@kgu.de](mailto:Katrin.Bankov@kgu.de)  
[Nina.Becker@kgu.de](mailto:Nina.Becker@kgu.de)  
[Till-Martin.Theilen@kgu.de](mailto:Till-Martin.Theilen@kgu.de)  
[steffen.gretser@kgu.de](mailto:steffen.gretser@kgu.de)  
[Elise.Gradhand@kgu.de](mailto:Elise.Gradhand@kgu.de)  
[carsten.kummerow@gmail.com](mailto:carsten.kummerow@gmail.com)  
[Evelyn.Ullrich@kgu.de](mailto:Evelyn.Ullrich@kgu.de)  
[s.wiedemann@kinderkrebsstiftung-frankfurt.de](mailto:s.wiedemann@kinderkrebsstiftung-frankfurt.de)

Dear Meike,

I agree to the change in authorship.

Best regards,

Sara

---

Original Message processed by david@

**CDDISCOVERY-21-2714R1 - Confirmation of authorship** 13. Dezember 2021, 09:42 Uhr

**Von** [Dr. Meike Vogler](#)

**An** (16) [Vinzenz Särchen](#) | [Senthana Shanmugalingam](#) | [maureenjacob@gmx.net](#) | [Sarah Kehr](#) | [LisaMarie.Reindl@kgu.de](#) | [sibylle.wehner@kgu.de](#) | [Victoria.Greze@kgu.de](#) | [Cathinka Boedicker](#) | [Katrin.Bankov@kgu.de](#) | [Nina.Becker@kgu.de](#) | [Theilen, Till](#) | [steffen.gretser@kgu.de](#) | [Elise.Gradhand@kgu.de](#) | [carsten.kummerow@gmail.com](#) | [Evelyn.Ullrich@kgu.de](#) | [Sara Wiedemann](#)

Hohe Priorität

Dear all,

the journal CDDisc would like us all to approve the addition of Sara Wiedemann as additional author to our manuscript. Sara is a new colleague who has helped us with the experiments during the revision. This confirmation is a common formality required when you add authors during revisions.

**Could I please ask you all to reply to this email stating that you agree to the change in authorship as per the journal's instructions below?**

"It has come to our attention that your most recent author list differs from the one in your original submission. We find that the following authors have been added since your initial submission: Sara Wiedemann

Please request agreement from all authors including additions and deletions, these can be collected in the following way:

Email your co-authors with the change, and ask them to reply to your email confirming that they agree to these changes. Once you have collected these replies, please combine all of the co-authors' email responses in one document and upload this file to your submission."

Thanks a lot,

Meike

---

Dr. Meike Vogler

Laborleitung

Institut für Experimentelle Tumorforschung in der Pädiatrie

Goethe-Universität Frankfurt

Im Dr. Petra Joh-Haus der Frankfurter Stiftung für krebskranke Kinder

Komturstraße 3a

60528 Frankfurt a. M.

Tel.: 069 678 665 -74

E-Mail: [m.vogler@kinderkrebsstiftung-frankfurt.de](mailto:m.vogler@kinderkrebsstiftung-frankfurt.de)

Internet: <http://www.kinderkrebsstiftung-frankfurt.de>

To: [v.saerchen@kinderkrebsstiftung-frankfurt.de](mailto:v.saerchen@kinderkrebsstiftung-frankfurt.de)  
[s.shanmugalingam@kinderkrebsstiftung-frankfurt.de](mailto:s.shanmugalingam@kinderkrebsstiftung-frankfurt.de)  
[maureenjacob@gmx.net](mailto:maureenjacob@gmx.net)  
[sarahkehr@gmx.de](mailto:sarahkehr@gmx.de)  
[LisaMarie.Reindl@kgu.de](mailto:LisaMarie.Reindl@kgu.de)  
[Sibylle.Weohner@kgu.de](mailto:Sibylle.Weohner@kgu.de)  
[Victoria.Greze@kgu.de](mailto:Victoria.Greze@kgu.de)  
[c.boedicker@kinderkrebsstiftung-frankfurt.de](mailto:c.boedicker@kinderkrebsstiftung-frankfurt.de)  
[Katrin.Bankov@kgu.de](mailto:Katrin.Bankov@kgu.de)  
[Nina.Becker@kgu.de](mailto:Nina.Becker@kgu.de)  
[Till-Martin.Theilen@kgu.de](mailto:Till-Martin.Theilen@kgu.de)  
[steffen.gretser@kgu.de](mailto:steffen.gretser@kgu.de)  
[Elise.Gradhand@kgu.de](mailto:Elise.Gradhand@kgu.de)  
[carsten.kummerow@gmail.com](mailto:carsten.kummerow@gmail.com)  
[Evelyn.Ullrich@kgu.de](mailto:Evelyn.Ullrich@kgu.de)  
[s.wiedemann@kinderkrebsstiftung-frankfurt.de](mailto:s.wiedemann@kinderkrebsstiftung-frankfurt.de)

Dear Meike,

Thank you for your E-Mail.

I agree to the addition of Sara Wiedemann as an author.

Sarah

**Gesendet:** Montag, 13. Dezember 2021 um 09:42 Uhr

**Von:** "Dr. Meike Vogler" <m.vogler@kinderkrebsstiftung-frankfurt.de>

**An:** "Vinzenz Särchen" <v.saerchen@kinderkrebsstiftung-frankfurt.de>, "Senthana Shanmugalingam" <s.shanmugalingam@kinderkrebsstiftung-frankfurt.de>, maureenjacob@gmx.net, "Sarah Kehr" <sarahkehr@gmx.de>, LisaMarie.Reindl@kgu.de, "sibylle.wehner@kgu.de" <Sibylle.Wehner@kgu.de>, Victoria.Greze@kgu.de, "Cathinka Boedicker" <c.boedicker@kinderkrebsstiftung-frankfurt.de>, Katrin.Bankov@kgu.de, Nina.Becker@kgu.de, "Theilen, Till" <Till-Martin.Theilen@kgu.de>, steffen.gretser@kgu.de, Elise.Gradhand@kgu.de, carsten.kummerow@gmail.com, Evelyn.Ullrich@kgu.de, "Sara Wiedemann" <s.wiedemann@kinderkrebsstiftung-frankfurt.de>

**Betreff:** CDDISCOVERY-21-2714R1 - Confirmation of authorship

Dear all,

the journal CDDisc would like us all to approve the addition of Sara Wiedemann as additional author to our manuscript. Sara is a new colleague who has helped us with the experiments during the revision. This confirmation is a common formality required when you add authors during revisions.

**Could I please ask you all to reply to this email stating that you agree to the change in authorship as per the journal's instructions below?**

"It has come to our attention that your most recent author list differs from the one in your original submission. We find that the following authors have been added since your initial submission: Sara Wiedemann

Please request agreement from all authors including additions and deletions, these can be collected in the following way:

Email your co-authors with the change, and ask them to reply to your email confirming that they agree to these changes. Once you have collected these replies, please combine all of the co-authors' email responses in one document and upload this file to your submission."

Thanks a lot,

Meike

---

Dr. Meike Vogler

Laborleitung

Institut für Experimentelle Tumorforschung in der Pädiatrie

Goethe-Universität Frankfurt

Im Dr. Petra Joh-Haus der Frankfurter Stiftung für krebskranke Kinder

Komturstraße 3a

60528 Frankfurt a. M.

Tel.: 069 678 665 -74

E-Mail: [m.vogler@kinderkrebsstiftung-frankfurt.de](mailto:m.vogler@kinderkrebsstiftung-frankfurt.de)

Internet: <http://www.kinderkrebsstiftung-frankfurt.de>

To: [v.saerchen@kinderkrebsstiftung-frankfurt.de](mailto:v.saerchen@kinderkrebsstiftung-frankfurt.de)  
[s.shanmugalingam@kinderkrebsstiftung-frankfurt.de](mailto:s.shanmugalingam@kinderkrebsstiftung-frankfurt.de)  
[maureenjacob@gmx.net](mailto:maureenjacob@gmx.net)  
[sarahkehr@gmx.de](mailto:sarahkehr@gmx.de)  
[LisaMarie.Reindl@kgu.de](mailto:LisaMarie.Reindl@kgu.de)  
[Sibylle.Weohner@kgu.de](mailto:Sibylle.Weohner@kgu.de)  
[Victoria.Greze@kgu.de](mailto:Victoria.Greze@kgu.de)  
[c.boedicker@kinderkrebsstiftung-frankfurt.de](mailto:c.boedicker@kinderkrebsstiftung-frankfurt.de)  
[Katrin.Bankov@kgu.de](mailto:Katrin.Bankov@kgu.de)  
[Nina.Becker@kgu.de](mailto:Nina.Becker@kgu.de)  
[Till-Martin.Theilen@kgu.de](mailto:Till-Martin.Theilen@kgu.de)  
[steffen.gretser@kgu.de](mailto:steffen.gretser@kgu.de)  
[Elise.Gradhand@kgu.de](mailto:Elise.Gradhand@kgu.de)  
[carsten.kummerow@gmail.com](mailto:carsten.kummerow@gmail.com)  
[Evelyn.Ullrich@kgu.de](mailto:Evelyn.Ullrich@kgu.de)  
[s.wiedemann@kinderkrebsstiftung-frankfurt.de](mailto:s.wiedemann@kinderkrebsstiftung-frankfurt.de)

Hi Meike,

**I agree to the change in authorship as per the journal's instructions below in the formerly sent e-mail.**

**Senthan**

Am 13.12.2021 09:42 schrieb "Dr. Meike Vogler" <m.vogler@kinderkrebsstiftung-frankfurt.de>:

Dear all,

the journal CDDisc would like us all to approve the addition of Sara Wiedemann as additional author to our manuscript. Sara is a new colleague who has helped us with the experiments during the revision. This confirmation is a common formality required when you add authors during revisions.

**Could I please ask you all to reply to this email stating that you agree to the change in authorship as per the journal's instructions below?**

"It has come to our attention that your most recent author list differs from the one in your original submission. We find that the following authors have been added since your initial submission: Sara Wiedemann

Please request agreement from all authors including additions and deletions, these can be collected in the following way:

Email your co-authors with the change, and ask them to reply to your email confirming that they agree to these changes. Once you have collected these replies, please combine all of the co-authors' email responses in one document and upload this file to your submission."

Thanks a lot,

Meike

---

Dr. Meike Vogler

Laborleitung  
Institut für Experimentelle Tumorforschung in der Pädiatrie  
Goethe-Universität Frankfurt  
Im Dr. Petra Joh-Haus der Frankfurter Stiftung für krebskranke Kinder  
Konturstraße 3a  
60528 Frankfurt a. M.  
Tel.: 069 678 665 -74  
E-Mail: m.vogler@kinderkrebsstiftung-frankfurt.de  
Internet: <http://www.kinderkrebsstiftung-frankfurt.de>

To: v.saerchen@kinderkrebsstiftung-frankfurt.de  
s.shanmugalingam@kinderkrebsstiftung-frankfurt.de  
maureenjacob@gmx.net  
sarahkehr@gmx.de  
LisaMarie.Reindl@kgu.de  
Sibylle.Weigner@kgu.de  
Victoria.Greze@kgu.de  
c.boedicker@kinderkrebsstiftung-frankfurt.de  
Katrin.Bankov@kgu.de  
Nina.Becker@kgu.de  
Till-Martin.Theilen@kgu.de



steffen.gretser@kgu.de  
Elise.Gradhand@kgu.de  
carsten.kummerow@gmail.com  
Evelyn.Ullrich@kgu.de  
s.wiedemann@kinderkrebsstiftung-frankfurt.de

Dear Meike,  
I agree to the change in authorship as per the journal's instructions below.

Best regards, Sibylle Wehner

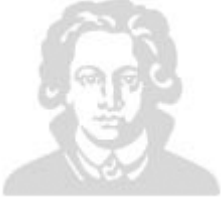

### **Sibylle Wehner**

Lab Special Pediatric Hematology

#### **University Hospital Frankfurt**

Clinic for Pediatrics and Young Adults (KKJM)  
Pediatrics Hematology, Oncology, Hemostaseology  
Stem Cell Transplantation and Immunology  
Theodor-Stern-Kai 7  
D-60590 Frankfurt  
Germany

Mobile: +49 15117190251  
Mobile intern : 170679  
Fax: +49 69 6301-83338  
Mail: [sibylle.wehner@kgu.de](mailto:sibylle.wehner@kgu.de)  
Web: [www.kgu.de](http://www.kgu.de)

---

**Von:** Dr. Meike Vogler <m.vogler@kinderkrebsstiftung-frankfurt.de>

**Gesendet:** Montag, 13. Dezember 2021 09:42

**An:** Vinzenz Särchen <v.saerchen@kinderkrebsstiftung-frankfurt.de>; Senthana Shanmugalingam <s.shanmugalingam@kinderkrebsstiftung-frankfurt.de>; maureenjacob@gmx.net; Sarah Kehr <sarahkehr@gmx.de>; Reindl, Lisa Marie <LisaMarie.Reindl@kgu.de>; Wehner, Sibylle <Sibylle.Wehner@kgu.de>; Greze, Victoria <Victoria.Greze@kgu.de>; Cathinka Boedicker <c.boedicker@kinderkrebsstiftung-frankfurt.de>; Bankov, Katrin <Katrin.Bankov@kgu.de>; Becker, Nina <Nina.Becker@kgu.de>; Theilen, Till <Till-Martin.Theilen@kgu.de>; Gretser, Steffen <Steffen.Gretser@kgu.de>; Gradhand, Elise Dr. <Elise.Gradhand@kgu.de>; carsten.kummerow@gmail.com; Ullrich, Evelyn Prof. Dr. <Evelyn.Ullrich@kgu.de>; Sara Wiedemann <s.wiedemann@kinderkrebsstiftung-frankfurt.de>

**Betreff:** CDDISCOVERY-21-2714R1 - Confirmation of authorship

**Priorität:** Hoch

Dear all,

the journal CDDisc would like us all to approve the addition of Sara Wiedemann as additional author to our manuscript. Sara is a new colleague who has helped us with the experiments during the revision. This confirmation is a common formality required when you add authors during revisions.

**Could I please ask you all to reply to this email stating that you agree to the change in authorship as per the journal's instructions below?**

"It has come to our attention that your most recent author list differs from the one in your original submission. We find that the following authors have been added since your initial submission: Sara Wiedemann

Please request agreement from all authors including additions and deletions, these can be collected in the following way:

Email your co-authors with the change, and ask them to reply to your email confirming that they agree to these changes. Once you have collected these replies, please combine all of the co-authors' email responses in one document and upload this file to your submission."

Thanks a lot,

Meike

---

Dr. Meike Vogler

Laborleitung

Institut für Experimentelle Tumorforschung in der Pädiatrie

Goethe-Universität Frankfurt

Im Dr. Petra Joh-Haus der Frankfurter Stiftung für krebskranke Kinder

Komturstraße 3a

60528 Frankfurt a. M.

Tel.: 069 678 665 -74

E-Mail: [m.vogler@kinderkrebsstiftung-frankfurt.de](mailto:m.vogler@kinderkrebsstiftung-frankfurt.de)

Internet: <http://www.kinderkrebsstiftung-frankfurt.de>

To: [v.saerchen@kinderkrebsstiftung-frankfurt.de](mailto:v.saerchen@kinderkrebsstiftung-frankfurt.de)  
[s.shanmugalingam@kinderkrebsstiftung-frankfurt.de](mailto:s.shanmugalingam@kinderkrebsstiftung-frankfurt.de)  
[maureenjacob@gmx.net](mailto:maureenjacob@gmx.net)  
[sarahkehr@gmx.de](mailto:sarahkehr@gmx.de)  
[LisaMarie.Reindl@kgu.de](mailto:LisaMarie.Reindl@kgu.de)  
[Sibylle.Wechner@kgu.de](mailto:Sibylle.Wechner@kgu.de)  
[Victoria.Greze@kgu.de](mailto:Victoria.Greze@kgu.de)  
[c.boedicker@kinderkrebsstiftung-frankfurt.de](mailto:c.boedicker@kinderkrebsstiftung-frankfurt.de)

[Katrin.Bankov@kgu.de](mailto:Katrin.Bankov@kgu.de)

[Nina.Becker@kgu.de](mailto:Nina.Becker@kgu.de)

[Till-Martin.Theilen@kgu.de](mailto:Till-Martin.Theilen@kgu.de)

[steffen.gretser@kgu.de](mailto:steffen.gretser@kgu.de)

[Elise.Gradhand@kgu.de](mailto:Elise.Gradhand@kgu.de)

[carsten.kummerow@gmail.com](mailto:carsten.kummerow@gmail.com)

[Evelyn.Ullrich@kgu.de](mailto:Evelyn.Ullrich@kgu.de)

[s.wiedemann@kinderkrebsstiftung-frankfurt.de](mailto:s.wiedemann@kinderkrebsstiftung-frankfurt.de)

Dear Meike,

I fully agree to the change in authorship and the inclusion of Sara Wiedemann as an additional author.

Sincerely,

Steffen

---

**Von:** Dr. Meike Vogler <m.vogler@kinderkrebsstiftung-frankfurt.de>

**Gesendet:** Montag, 13. Dezember 2021 09:42

**An:** Vinzenz Särchen <v.saerchen@kinderkrebsstiftung-frankfurt.de>; Senthana Shanmugalingam <s.shanmugalingam@kinderkrebsstiftung-frankfurt.de>; maureenjacob@gmx.net; Sarah Kehr <sarahkehr@gmx.de>; Reindl, Lisa Marie <LisaMarie.Reindl@kgu.de>; Wehner, Sibylle <Sibylle.Wehner@kgu.de>; Greze, Victoria <Victoria.Greze@kgu.de>; Cathinka Boedicker <c.boedicker@kinderkrebsstiftung-frankfurt.de>; Bankov, Katrin <Katrin.Bankov@kgu.de>; Becker, Nina <Nina.Becker@kgu.de>; Theilen, Till <Till-Martin.Theilen@kgu.de>; Gretser, Steffen <Steffen.Gretser@kgu.de>; Gradhand, Elise Dr. <Elise.Gradhand@kgu.de>; carsten.kummerow@gmail.com; Ullrich, Evelyn Prof. Dr. <Evelyn.Ullrich@kgu.de>; Sara Wiedemann <s.wiedemann@kinderkrebsstiftung-frankfurt.de>

**Betreff:** CDDISCOVERY-21-2714R1 - Confirmation of authorship

**Priorität:** Hoch

Dear all,

the journal CDDisc would like us all to approve the addition of Sara Wiedemann as additional author to our manuscript. Sara is a new colleague who has helped us with the experiments during the revision. This confirmation is a common formality required when you add authors during revisions.

**Could I please ask you all to reply to this email stating that you agree to the change in authorship as per the journal's instructions below?**

"It has come to our attention that your most recent author list differs from the one in your original submission. We find that the following authors have been added since your initial submission: Sara Wiedemann

Please request agreement from all authors including additions and deletions, these can be collected in the following way:

Email your co-authors with the change, and ask them to reply to your email confirming that they agree to these changes. Once you have collected these replies, please combine all of the co-authors' email responses in one document and upload this file to your submission."

Thanks a lot,

Meike

---

Dr. Meike Vogler

Laborleitung

Institut für Experimentelle Tumorforschung in der Pädiatrie

Goethe-Universität Frankfurt

Im Dr. Petra Joh-Haus der Frankfurter Stiftung für krebskranke Kinder

Komturstraße 3a

60528 Frankfurt a. M.

Tel.: 069 678 665 -74

E-Mail: [m.vogler@kinderkrebsstiftung-frankfurt.de](mailto:m.vogler@kinderkrebsstiftung-frankfurt.de)

Internet: <http://www.kinderkrebsstiftung-frankfurt.de>

To: [v.saerchen@kinderkrebsstiftung-frankfurt.de](mailto:v.saerchen@kinderkrebsstiftung-frankfurt.de)  
[s.shanmugalingam@kinderkrebsstiftung-frankfurt.de](mailto:s.shanmugalingam@kinderkrebsstiftung-frankfurt.de)  
[maureenjacob@gmx.net](mailto:maureenjacob@gmx.net)  
[sarahkehr@gmx.de](mailto:sarahkehr@gmx.de)  
[LisaMarie.Reindl@kgu.de](mailto:LisaMarie.Reindl@kgu.de)  
[Sibylle.Weohner@kgu.de](mailto:Sibylle.Weohner@kgu.de)  
[Victoria.Greze@kgu.de](mailto:Victoria.Greze@kgu.de)  
[c.boedicker@kinderkrebsstiftung-frankfurt.de](mailto:c.boedicker@kinderkrebsstiftung-frankfurt.de)  
[Katrin.Bankov@kgu.de](mailto:Katrin.Bankov@kgu.de)  
[Nina.Becker@kgu.de](mailto:Nina.Becker@kgu.de)  
[Till-Martin.Theilen@kgu.de](mailto:Till-Martin.Theilen@kgu.de)  
[steffen.gretser@kgu.de](mailto:steffen.gretser@kgu.de)  
[Elise.Gradhand@kgu.de](mailto:Elise.Gradhand@kgu.de)  
[carsten.kummerow@gmail.com](mailto:carsten.kummerow@gmail.com)  
[Evelyn.Ullrich@kgu.de](mailto:Evelyn.Ullrich@kgu.de)  
[s.wiedemann@kinderkrebsstiftung-frankfurt.de](mailto:s.wiedemann@kinderkrebsstiftung-frankfurt.de)

Dear Meike,  
I agree with adding Sara Wiedemann to the author list.  
Thank you.  
Till-Martin Theilen

Am 13.12.2021 um 09:42 schrieb Dr. Meike Vogler <m.vogler@kinderkrebsstiftung-frankfurt.de>:

Dear all,

the journal CDDisc would like us all to approve the addition of Sara Wiedemann as additional author to our manuscript. Sara is a new colleague who has helped us with the experiments during the revision. This confirmation is a common formality required when you add authors during revisions.

**Could I please ask you all to reply to this email stating that you agree to the change in authorship as per the journal's instructions below?**

"It has come to our attention that your most recent author list differs from the one in your original submission. We find that the following authors have been added since your initial submission: Sara Wiedemann

Please request agreement from all authors including additions and deletions, these can be collected in the following way:

Email your co-authors with the change, and ask them to reply to your email confirming that they agree to these changes. Once you have collected these replies, please combine all of the co-authors' email responses in one document and upload this file to your submission."

Thanks a lot,

Meike

-----  
Dr. Meike Vogler

Laborleitung  
Institut für Experimentelle Tumorforschung in der Pädiatrie  
Goethe-Universität Frankfurt  
Im Dr. Petra Joh-Haus der Frankfurter Stiftung für krebskranke Kinder  
Konturstraße 3a  
60528 Frankfurt a. M.  
Tel.: 069 678 665 -74  
E-Mail: m.vogler@kinderkrebsstiftung-frankfurt.de  
Internet: <https://ddee3-0-ctp.trendmicro.com:443/wis/clicktime/v1/query?url=http%3a%2f%2fwww.kinderkrebsstiftung%2dfrankfurt.de&umid=D9E23912-D303-0D05-8FA8-3C69B4C3FBCC&auth=0add78fbf5bb9f3932276e031687124c15a6990b-a67a0f9dec78df500f0299394bddec1abef64c30>

To: v.saerchen@kinderkrebsstiftung-frankfurt.de  
s.shanmugalingam@kinderkrebsstiftung-frankfurt.de  
maureenjacob@gmx.net  
sarahkehr@gmx.de  
LisaMarie.Reindl@kgu.de  
Sibylle.Wechner@kgu.de

Victoria.Greze@kgu.de  
c.boedicker@kinderkrebsstiftung-frankfurt.de  
Katrin.Bankov@kgu.de  
Nina.Becker@kgu.de  
Till-Martin.Theilen@kgu.de  
steffen.gretser@kgu.de  
Elise.Gradhand@kgu.de  
carsten.kummerow@gmail.com  
Evelyn.Ullrich@kgu.de  
s.wiedemann@kinderkrebsstiftung-frankfurt.de



Dear Meike,

I agree to these changes.

Victoria Grèze.

---

**Von:** Dr. Meike Vogler <m.vogler@kinderkrebsstiftung-frankfurt.de>

**Gesendet:** Montag, 13. Dezember 2021 09:42:25

**An:** Vinzenz Särchen; Senthana Shanmugalingam; maureenjacob@gmx.net; Sarah Kehr; Reindl, Lisa Marie; Wehner, Sibylle; Greze, Victoria; Cathinka Boedicker; Bankov, Katrin; Becker, Nina; Theilen, Till; Gretser, Steffen; Gradhand, Elise Dr.; carsten.kummerow@gmail.com; Ullrich, Evelyn Prof. Dr.; Sara Wiedemann

**Betreff:** CDDISCOVERY-21-2714R1 - Confirmation of authorship

Dear all,

the journal CDDisc would like us all to approve the addition of Sara Wiedemann as additional author to our manuscript. Sara is a new colleague who has helped us with the experiments during the revision. This confirmation is a common formality required when you add authors during revisions.

**Could I please ask you all to reply to this email stating that you agree to the change in authorship as per the journal's instructions below?**

"It has come to our attention that your most recent author list differs from the one in your original submission. We find that the following authors have been added since your initial submission: Sara Wiedemann

Please request agreement from all authors including additions and deletions, these can be collected in the following way:

Email your co-authors with the change, and ask them to reply to your email confirming that they agree to these changes. Once you have collected these replies, please combine all of the co-authors' email responses in one document and upload this file to your submission."

Thanks a lot,

Meike

---

Dr. Meike Vogler

Laborleitung

Institut für Experimentelle Tumorforschung in der Pädiatrie

Goethe-Universität Frankfurt

Im Dr. Petra Joh-Haus der Frankfurter Stiftung für krebskranke Kinder

Komturstraße 3a

60528 Frankfurt a. M.

Tel.: 069 678 665 -74

E-Mail: [m.vogler@kinderkrebsstiftung-frankfurt.de](mailto:m.vogler@kinderkrebsstiftung-frankfurt.de)

Internet: <http://www.kinderkrebsstiftung-frankfurt.de>

To: v.saerchen@kinderkrebsstiftung-frankfurt.de  
s.shanmugalingam@kinderkrebsstiftung-frankfurt.de  
maureenjacob@gmx.net

sarahkehr@gmx.de  
LisaMarie.Reindl@kgu.de  
Sibylle.Wechner@kgu.de  
Victoria.Greze@kgu.de  
c.boedicker@kinderkrebsstiftung-frankfurt.de  
Katrin.Bankov@kgu.de  
Nina.Becker@kgu.de  
Till-Martin.Theilen@kgu.de  
steffen.gretser@kgu.de  
Elise.Gradhand@kgu.de  
carsten.kummerow@gmail.com  
Evelyn.Ullrich@kgu.de  
s.wiedemann@kinderkrebsstiftung-frankfurt.de

I, Vinzenz Särchen, agree with the addition of Sara Wiedemann as a co-author to our manuscript (CDDISCOVERY-21-2714R1).

---

Original Message processed by david@

**CDDISCOVERY-21-2714R1 - Confirmation of authorship** 13. Dezember 2021, 09:42 Uhr

**Von** [Dr. Meike Vogler](#)

**An** (16) [Vinzenz Särchen](#) | [Senthana Shanmugalingam](#) | [maureenjacob@gmx.net](#) | [Sarah Kehr](#) | [LisaMarie.Reindl@kgu.de](#) | [sibylle.wehner@kgu.de](#) | [Victoria.Greze@kgu.de](#) | [Cathinka Boedicker](#) | [Katrin.Bankov@kgu.de](#) | [Nina.Becker@kgu.de](#) | [Theilen, Till](#) | [steffen.gretser@kgu.de](#) | [Elise.Gradhand@kgu.de](#) | [carsten.kummerow@gmail.com](#) | [Evelyn.Ullrich@kgu.de](#) | [Sara Wiedemann](#)

Hohe Priorität

Dear all,

the journal CDDisc would like us all to approve the addition of Sara Wiedemann as additional author to our manuscript. Sara is a new colleague who has helped us with the experiments during the revision. This confirmation is a common formality required when you add authors during revisions.

**Could I please ask you all to reply to this email stating that you agree to the change in authorship as per the journal's instructions below?**

"It has come to our attention that your most recent author list differs from the one in your original submission. We find that the following authors have been added since your initial submission: Sara Wiedemann

Please request agreement from all authors including additions and deletions, these can be collected in the following way:

Email your co-authors with the change, and ask them to reply to your email confirming that they agree to these changes. Once you have collected these replies, please combine all of the co-authors' email responses in one document and upload this file to your submission."

Thanks a lot,

Meike

---

Dr. Meike Vogler

Laborleitung

Institut für Experimentelle Tumorforschung in der Pädiatrie

Goethe-Universität Frankfurt

Im Dr. Petra Joh-Haus der Frankfurter Stiftung für krebskranke Kinder

Komturstraße 3a

60528 Frankfurt a. M.

Tel.: 069 678 665 -74

E-Mail: [m.vogler@kinderkrebsstiftung-frankfurt.de](mailto:m.vogler@kinderkrebsstiftung-frankfurt.de)

Internet: <http://www.kinderkrebsstiftung-frankfurt.de>

To: v.saerchen@kinderkrebsstiftung-frankfurt.de  
s.shanmugalingam@kinderkrebsstiftung-frankfurt.de  
maureenjacob@gmx.net  
sarahkehr@gmx.de  
LisaMarie.Reindl@kgu.de  
Sibylle.Weohner@kgu.de  
Victoria.Greze@kgu.de  
c.boedicker@kinderkrebsstiftung-frankfurt.de  
Katrln.Bankov@kgu.de  
Nlna.Becker@kgu.de  
Till-Martin.Theilen@kgu.de  
steffen.gretser@kgu.de  
Elise.Gradhand@kgu.de  
carsten.kummerow@gmail.com  
Evelyn.Ullrich@kgu.de  
s.wiedemann@kinderkrebsstiftung-frankfurt.de
